# 1 **Cholinergic Midbrain Afferents Modulate Striatal Circuits and Shape Encoding of** 2 **Action Control**

3 Daniel Dautan<sup>1,2,3</sup>, Icnelia Huerta-Ocampo<sup>1,3</sup>, Miguel Valencia<sup>4,5</sup>, Krishnakanth Kondabolu<sup>1</sup>,  
4 Todor V. Gerdjikov<sup>2</sup> and Juan Mena-Segovia<sup>1\*</sup>

5 <sup>1</sup> Center for Molecular and Behavioral Neuroscience, Rutgers University, Newark, NJ, USA

6 <sup>2</sup> Department of Neuroscience, Physiology and Behavior, University of Leicester, Leicester LE1  
7 9HN, UK

8 <sup>3</sup> MRC Anatomical Neuropharmacology Unit, Department of Pharmacology, University of  
9 Oxford, Oxford OX1 3TH, UK

10 <sup>4</sup> Neuroscience Program, Center for Applied Medical Research, University of Navarra, 31008  
11 Pamplona, Spain;

12 <sup>5</sup> Navarra Institute for Health Research, 31008 Pamplona, Spain.

13

14 \*Correspondence:

15 Center for Molecular and Behavioral Neuroscience, Rutgers University, Newark, NJ, USA

16 E-mail: [juan.mena@rutgers.edu](mailto:juan.mena@rutgers.edu)

17

18 **Keywords:** pedunculo pontine; laterodorsal tegmental; striatal cholinergic interneurons; spiny  
19 projection neurons; cholinergic transmission; transsynaptic retrograde tracing; goal-directed  
20 learning; habit formation; action-shifting.

21

## 22 **Summary**

23 Assimilation of novel strategies into a consolidated action repertoire is a crucial function for  
24 behavioral adaptation and cognitive flexibility. Acetylcholine in the striatum plays a pivotal role in  
25 such adaptation and its release has been causally associated with the activity of cholinergic  
26 interneurons. Here we show that the midbrain, a previously unknown source of acetylcholine in  
27 the striatum, is a major contributor to cholinergic transmission in the striatal complex. Neurons  
28 of the pedunculo pontine and laterodorsal tegmental nuclei synapse with striatal cholinergic  
29 interneurons and give rise to excitatory responses that, in turn, mediate inhibition of spiny  
30 projection neurons. Inhibition of acetylcholine release from midbrain terminals in the striatum  
31 impairs action shifting and mimics the effects observed following inhibition of acetylcholine  
32 release from striatal cholinergic interneurons. These results suggest the existence of two  
33 hierarchically-organized modes of cholinergic transmission in the striatum where cholinergic  
34 interneurons are modulated by cholinergic neurons of the midbrain.

## 35 **Introduction**

36 The striatum is the main input hub of the basal ganglia. Afferents from the cortex, thalamus and  
37 midbrain are widely distributed across its functional domains and together mediate action  
38 selection, among other functions. Acetylcholine (ACh) has a powerful influence over striatal  
39 circuits. Nicotinic and muscarinic receptors are expressed at pre- and post-synaptic sites in  
40 most striatal cell types and their afferents<sup>1-3</sup>, and differentially modulate striatal circuits (see  
41 review by<sup>4</sup>). Alteration in cholinergic activity has been shown to have key roles in adaptive  
42 behavior. For example, reduced cholinergic transmission impairs the ability to update previous  
43 learning and enhances the possibility of interference between novel and old contingencies<sup>5,6</sup>.

44 Cholinergic markers and released ACh were considered to be exclusively associated with  
45 cholinergic interneurons (CINs), which profusely innervate the entire extent of the striatum.  
46 While they are more densely concentrated in the matrix of the dorsal striatum<sup>7,8</sup>, their  
47 distribution is predominantly random and heterogeneous, thus lacking functional domains<sup>9</sup>. Our  
48 recent work demonstrated the existence of an extrinsic source of ACh in the striatum, which  
49 originates in the pedunculopontine nucleus (PPN) and the laterodorsal tegmental nucleus (LDT)  
50 in the midbrain<sup>10</sup>. PPN innervation of the striatum has been shown to exist in mice, rats and  
51 monkeys<sup>11-16</sup>, although its cholinergic nature was only recently revealed. In contrast to CINs  
52 innervation, cholinergic innervation arising in the midbrain is topographically organized<sup>10</sup> and  
53 predominantly restricted to the anterior striatum, which receives innervation from prefrontal  
54 cortical areas<sup>17</sup>. Thus, the cholinergic midbrain sends topographically organized projections to  
55 the entire extent of the anterior striatum, where the rostral segment of the cholinergic brainstem  
56 (PPN) preferentially innervates the dorsolateral striatum and the caudal cholinergic brainstem  
57 (LDT) preferentially innervates the dorsomedial and ventral striatum. At the synaptic level, PPN  
58 and LDT predominantly give rise to asymmetric specializations with dendritic shafts, suggesting  
59 excitatory connections, whereas cholinergic interneurons predominantly give rise to symmetric

60 specializations with dendritic spines, suggesting inhibitory connections <sup>10</sup>. The evidence of two  
61 sources of ACh in the striatum, each possessing different anatomical characteristics, raises the  
62 question of whether they provide differential contributions to striatal circuits.

63 Cholinergic neurons of the PPN and LDT are phasically activated in response to salient events  
64 or changes in brain state <sup>18-20</sup>. Their activation can induce transient fast frequency oscillations in  
65 thalamic circuits <sup>21</sup>, which presumably lead to cortical activation and EEG desynchronization. In  
66 parallel, cholinergic neurons modulate dopamine mesolimbic circuits that innervate the striatum  
67 <sup>22,23</sup>, suggesting that cholinergic neurons have a converging influence on striatal circuits through  
68 mesostriatal and thalamostriatal systems <sup>24</sup>. The recent evidence of direct synaptic connectivity  
69 with striatal neurons <sup>10</sup> further suggests that PPN and LDT modulate striatal activity. To  
70 understand the impact of the brainstem on striatal function, we used anatomical tracing, *in vivo*  
71 electrophysiology combined with optogenetics, and behavior combined with chemogenetics to  
72 determine the influence of the cholinergic midbrain on striatal circuits and compared it to that of  
73 striatal cholinergic interneurons. Our results reveal two intricately related but distinct modes of  
74 cholinergic transmission in the striatum.

75

## 76 **Results**

### 77 **Midbrain cholinergic neurons contact striatal cholinergic interneurons**

78 PPN/LDT cholinergic neurons preferentially innervate dendritic shafts (76%) in the striatum with  
79 a smaller proportion contacting dendritic spines (24%) suggesting a preferential innervation of  
80 interneurons over spiny projection neurons (SPNs) <sup>10</sup>. In order to identify the postsynaptic  
81 targets of midbrain cholinergic axons, we used a monosynaptic retrograde tracing strategy to  
82 label three of the main neuronal populations in the striatum: direct pathway SPNs, indirect  
83 pathway SPNs and CINs. Direct and indirect pathway neurons were labeled by injecting a

84 retrograde canine adenovirus (Cav2-Cre) into the substantia nigra pars reticulata (SNR; **Fig.**  
85 **1A**) or the external globus pallidus (GPE; **Fig. 1B**) of wild-type rats, respectively, thus inducing  
86 the retrograde transport and expression of Cre in striatonigral and striatopallidal projection  
87 neurons. Subsequently, two floxed viruses were co-injected into the striatum of SNR- and GPE-  
88 injected rats to induce the expression of a TVA receptor (AAV-FLEX-TVA-mCherry) and G  
89 glycoprotein (AAV-FLEX-G) in direct and indirect pathway neurons. In addition, the same helper  
90 viruses were injected in the striatum of ChAT::Cre rats to target CINs (**Fig. 1C**). Two weeks  
91 later, a G-deleted pseudotyped rabies virus (SAD $\Delta$ G-eGFP) was injected into the striatum of all  
92 three groups in order to infect neurons expressing the TVA receptor (*starter neurons*). Neurons  
93 also expressing the G glycoprotein allowed the transsynaptic transport of the pseudotyped  
94 rabies virus, thus labeling those neurons that have monosynaptic connections with Cre-  
95 expressing striatal neurons (*input neurons*)<sup>25</sup>. Seven-to-ten days later, the rats were perfused-  
96 fixed and their brains analyzed. eGFP-positive neurons were observed in the PPN and LDT of  
97 all three groups (**Fig. 1D, F, H; Fig. S1A**), some of which were immunopositive for choline  
98 acetyltransferase (ChAT). The total number of ChAT-positive input neurons could not be  
99 determined due to interference with the immunohistochemical detection. In some brains one or  
100 more of the injections were misplaced and did not show any eGFP-positive neurons thus  
101 serving as negative controls. The number of input neurons largely differed between the three  
102 experimental groups and CINs-injected rats gave rise to the largest number of PPN labeled  
103 neurons (**Fig. 1E, G, I; Fig. S1B**; direct SPNs:  $7.33 \pm 0.88$ ; indirect SPNs:  $12 \pm 2$ ; CINs:  $24 \pm$   
104  $3.34$ ; Kruskal-Wallis rank-sum test  $H(2) = 7.482$ ,  $P = 0.0237$ , *post hoc* two-sample Wilcoxon  
105 rank-sum test  $Z_{iSPNs-dSPNs} = -1.556$ ,  $P = 0.1212$ ,  $Z_{CINs-iSPNs} = 2.121$ ,  $P = 0.0339$ ,  $Z_{dSPNs-CINs} = 2.141$ ,  
106  $P = 0.0323$ ). Given the marked differences in the density of SPNs and CINs in the striatum,  
107 where SPNs represent about 95% of the total striatal neurons (see review by<sup>26</sup>, we normalized  
108 the cell count of input neurons to the number of starter neurons in the striatum. For this purpose,  
109 we first analyzed the area of transduction and found that they were not statistically different ([in

110 mm<sup>2</sup>] direct SPNs:  $1.04 \pm 0.0082$ ; indirect SPNs:  $1.36 \pm 0.01$ ; CINs:  $1.62 \pm 0.0069$ ; **Fig. S1C-E**;  
111 Kruskal-Wallis Rank-sum test  $H(2) = 2.091$ ,  $P = 0.3515$ ). Then, we counted the number of  
112 starter neurons (which correlated with the expected density of each population across similar  
113 transduction areas: direct SPNs:  $357.55 \pm 37.43$ ; indirect SPNs:  $367.06 \pm 22.57$ ; CINs:  $96.32$   
114  $\pm 7.68$ ). We then used these numbers to calculate the proportion of input neurons in the PPN  
115 based on the number of starter neurons in the striatum for each group (Kruskal-Wallis Rank-  
116 sum test  $H(2)=7.436$ ,  $P = 0.0243$ ). We found that the proportion of PPN input neurons  
117 innervating CINs is significantly larger than the proportion innervating either striatonigral or  
118 striatopallidal SPNs (**Fig. 1J**; **Fig. S1B**; *post hoc* two-sample Wilcoxon rank-sum test:  $Z_{dSPNs-CINs}$   
119  $= -2.121$ ,  $P = 0.0339$ ;  $Z_{iSPNs-CINs} = -2.141$ ,  $P = 0.0323$ ,  $Z_{iSPNs-dSPNs} = -1.528$ ,  $P = 0.1212$ ). Similar  
120 proportions were observed when WGA-Cre was used instead of Cav2-cre, even though this  
121 tracer is expected to diffuse transsynaptically across striatal neurons and therefore overestimate  
122 the number of input neurons (**Fig. S1F**; comparison of injections in the SNR, GPE or striatum of  
123 WT animals, the latter labeled *all* striatal neurons; Kruskal-Wallis Rank-sum test  $H(2)=7.395$ ,  $P$   
124  $= 0.0248$ , *post hoc* two-sample Wilcoxon rank-sum test:  $Z_{dSPNs-all} = 2.449$ ,  $P = 0.0143$ ;  $Z_{iSPNs-all} =$   
125  $-2.121$ ,  $P = 0.0339$ ,  $Z_{iSPNs-dSPNs} = 0.149$ ,  $P = 0.8815$ ). However, the interpretation of the  
126 differences between the number of inputs to each striatal cell type is limited to the potential  
127 differences in the transduction efficiency of each neuron/pathway, and the results must be taken  
128 with caution. For this reason, while it is not possible to estimate the density of innervation of  
129 SPNs and CINs from quantifying the number of input neurons in the PPN, our data reveal that a  
130 larger number of PPN neurons innervate CINs compared to SPNs, thus suggesting a  
131 preferential innervation of PPN neurons to CINs over direct and indirect pathway SPNs.

132

133

134

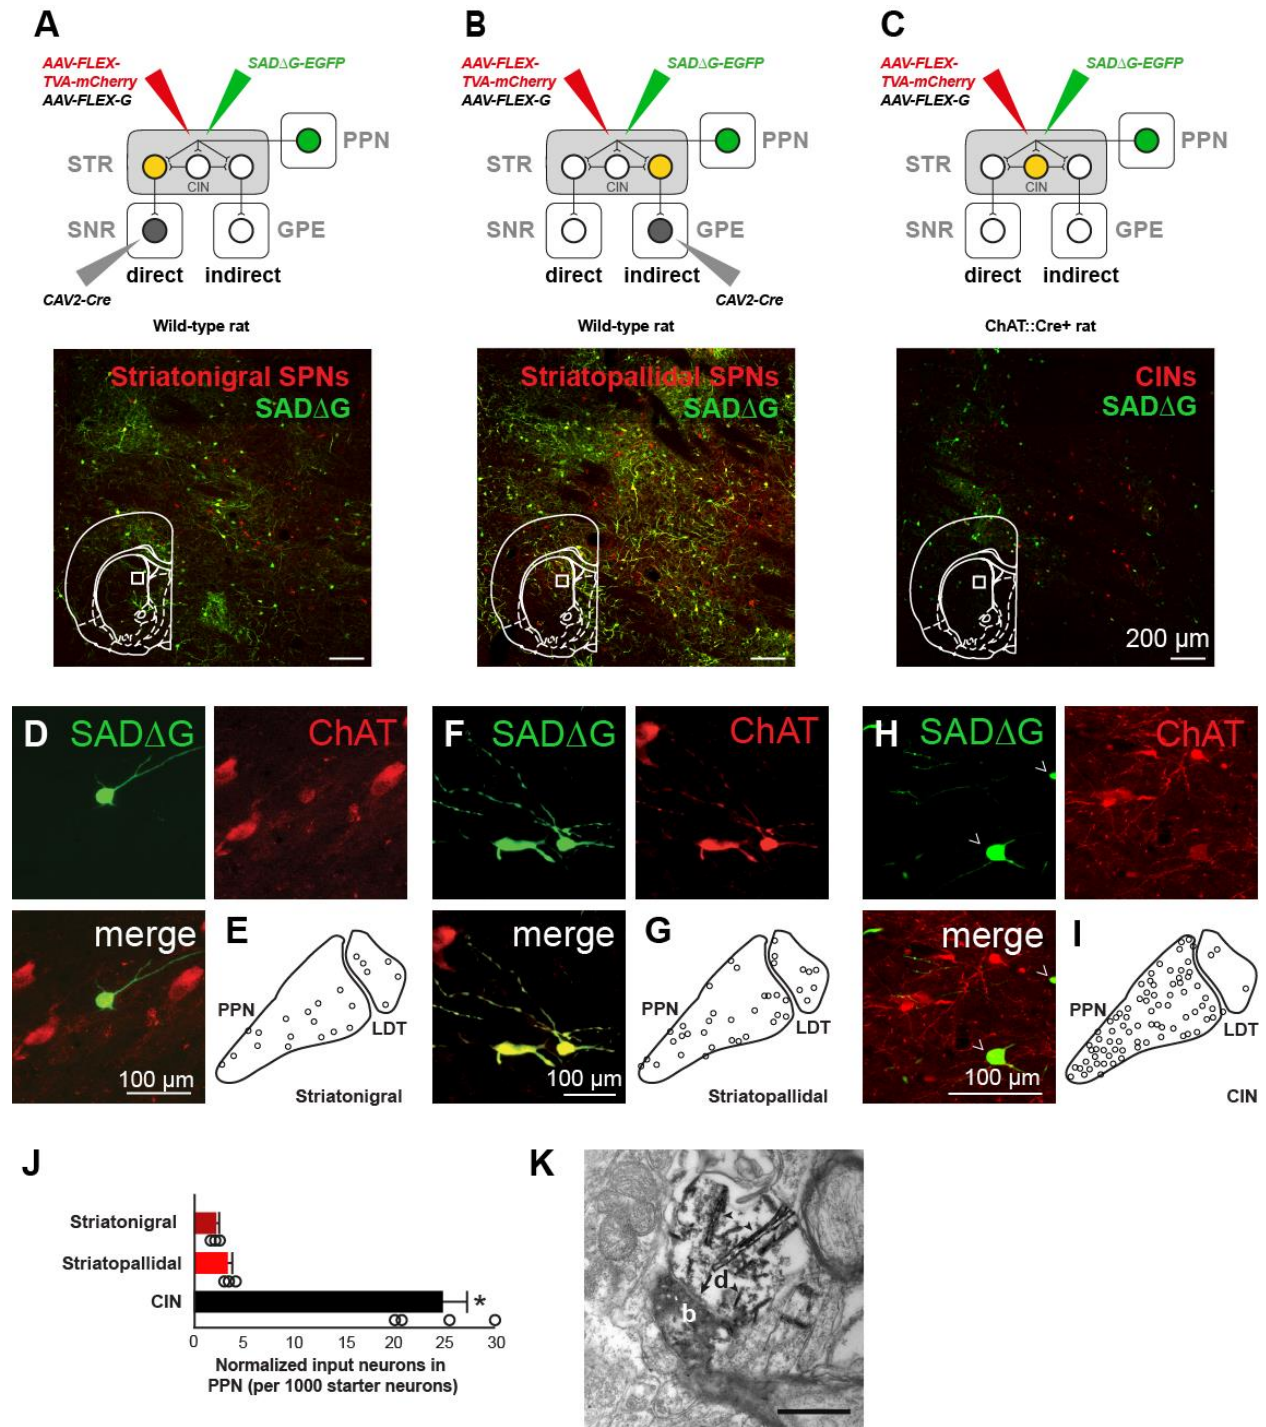

135

136

137

138



### Figure 1: Cholinergic inputs to striatal neurons

(A) Transsynaptic labeling of striatonigral SPNs following retrograde Cre transduction in the substantia nigra pars reticulata (SNR) and pseudorabies transduction in the striatum (STR), showing both mCherry-positive neurons (red, starter neurons) and YFP-positive neurons (green, input neurons). Cholinergic input neurons (D) were observed in the pedunculopontine nucleus (PPN) and the laterodorsal tegmental nucleus (LDT) (E, sum of 3 rats).

(B) Transsynaptic labeling of striatopallidal SPN following retrograde Cre transduction in the external globus pallidus (GPE) and pseudorabies transduction in the striatum (STR). Cholinergic inputs neurons (F) were present in the PPN and LDT (G, sum of 3 rats).

(C) Transsynaptic labeling of cholinergic interneurons (CINs) in the ChAT::Cre rat following pseudorabies infection in STR. Cholinergic inputs neurons (H) were present in the PPN and LDT (I, sum of 3 rats).

(J) Quantification of inputs neurons in the PPN and LDT (each circle represents one rat, obtained from  $n = 3$  rats in striatonigral and striatopallidal labeling, and  $n = 4$  rats in CINs [an extra animal was added to the analysis]), suggesting that CINs are preferentially targeted by PPN neurons.

(K) Electron microscope image showing an asymmetric synapse in the striatum (black arrow) formed between a cholinergic YFP+ bouton (b; from the PPN) and a CIN dendrite (d). Arrowheads show the accumulation of TMB crystals.

139 Scale bar: K, 500nm. Individual data points and mean  $\pm$  SEM are shown. \*  $P < 0.05$ .

140

141 Next, to identify synaptic connections between PPN/LDT cholinergic axons and CINs, we used  
142 an anterograde strategy based on the transduction of YFP in midbrain cholinergic axons of  
143 ChAT::Cre+ rats ( $n=3$ ) in combination with double immunohistochemistry at the electron  
144 microscopic level. PPN YFP-positive axons were converted to a permanent peroxidase reaction  
145 using diaminobenzidine (DAB, 0.025%) and nickel ammonium sulfate (0.05%). In addition, CIN  
146 cell bodies and processes were immunolabeled with an antibody against ChAT and revealed  
147 using tetramethylbenzidine (TMB 0.2%). PPN/LDT axons, identified by the NiDAB reaction  
148 product, were observed to make synaptic contacts with dendritic processes of TMB-labeled i.e.  
149 ChAT-positive (**Fig. 1K**) and non-labeled structures. Synapses formed with CIN dendrites were  
150 identified as asymmetric (Gray's Type 1) synapses, suggesting an excitatory connection ( $n = 3$ ),  
151 and in line with our previous report identifying the majority of PPN-originated synaptic terminals  
152 onto dendritic shafts as asymmetric<sup>10</sup>. These data confirm the transsynaptic retrograde findings  
153 and support the evidence of a direct, monosynaptic input from PPN/LDT cholinergic neurons to  
154 striatal CINs.

155

## 156 **Differential modulation of striatal neurons by midbrain cholinergic axons**

157 We next tested the effects of stimulating PPN/LDT cholinergic axons on the activity of different  
158 types of striatal neurons and compared the effects to the responses elicited by stimulating CINs  
159 axons (**Fig. 2, 3**). Cholinergic neurons of the striatum, PPN or LDT were transduced with  
160 channelrhodopsin-2 (ChR2) in ChAT::Cre<sup>+</sup> rats (AAV2-DIO-EF1a-ChR2-YFP; **Fig. 2A-B**) in  
161 order to produce a differential optogenetic activation of midbrain or CINs axons. The  
162 spontaneous activity of individual striatal neurons was first recorded *in vivo* in anesthetized  
163 animals, then cholinergic axons were stimulated with blue light to activate ChR2 (50ms pulses,  
164 10 Hz) through an optic fiber that was integrated within the recording glass pipette electrode to  
165 reduce the spread of the light; the recorded neurons were subsequently labeled with neurobiotin  
166 using the juxtacellular method (**Fig. 2C, F, I; Fig. 3A, D, G; <sup>22</sup>**) and their neurochemical nature  
167 was confirmed using immunohistochemistry. During urethane-induced slow-wave activity  
168 (detected by the electrocorticogram, ECoG), different types of striatal neuron exhibited different  
169 firing rates (basal firing rate, SPNs:  $1.19 \pm 0.13$  Hz,  $n = 91$ ; CINs  $2.86 \pm 0.37$  Hz,  $n = 53$ ;  
170 parvalbumin-expressing interneurons [PV]:  $7.24 \pm 1.33$  Hz,  $n = 28$ ), in agreement with previous  
171 studies <sup>27</sup>. We confirmed that expression of ChR2 in CINs increases their firing discharge during  
172 presentation of blue light (**Fig. S2A-D**). The same light stimulation affected neither the firing rate  
173 of neurons expressing the reporter alone (AAV-DIO-YFP; **Fig. S2E-G**) nor the activity of their  
174 postsynaptic targets (data not shown). Activation of ChR2-expressing cholinergic axons had  
175 distinct effects on different subtypes of striatal neurons, and only those recorded/labeled  
176 neurons within areas of YFP-transduced axons were observed to respond to the stimulation  
177 (**Fig. 2D, G, J; Fig. 3B, E, H**); for this reason, PPN axon stimulation only produced responses in  
178 the dorsolateral striatum and LDT axon stimulation only produced responses in the dorsomedial  
179 striatum; (**Fig. S3**, see also <sup>10</sup>). In SPNs, all three sets of cholinergic axons produced a  
180 significant reduction in the firing rate during the presentation of blue light (**Fig. 2E, H, K**; cluster-



181 based permutation test, 200 permutations,  $P < 0.05$ ). Furthermore, there was no significant  
182 effect in the magnitude of the inhibition between PPN, LDT and CINs (% change in firing rates:  
183 PPN,  $-79.58 \pm 2.56$ ,  $n = 29$ ; LDT,  $-78.39 \pm 1.92$ ,  $n = 19$ ; CINs,  $-79.24 \pm 2.43$ ,  $n = 43$ ; one-way  
184 ANOVA  $F(2,64) = 0.042$ ,  $P = 0.959$ ). However, the latency of the inhibition was shorter for CINs  
185 (0.19 s after laser onset, defined by the inhibition period identified by the permutation test, see  
186 blue bar in **Fig. 2K**) compared to either of the midbrain sources, and LDT effects were shorter in  
187 duration when compared to PPN or CINs (4.03 s for PPN after laser onset, gray bar, **Fig. 2E**,  
188 and 1.92 s for LDT after laser onset, red bar, **Fig. 2H**). Repeated pulses of blue light stimulation  
189 in the PPN produced consistent effects across trials and revealed a long-lasting inhibition  
190 spanning several seconds (**Fig. S4**). Thus, optogenetic stimulation of cholinergic axons,  
191 regardless of the axon origin (i.e. PPN, LDT and CINs), produced a significant decrease in the  
192 firing rate of SPNs.

193 In contrast to SPNs, the effects on CINs were different depending on the origin of the  
194 cholinergic axons: Chr2 stimulation produced excitation of CINs if the axons originated in the  
195 midbrain (PPN  $n = 19$ , LDT  $n = 13$ ; **Fig. 3A, C, D, F**) but inhibition if the axons originated in the  
196 striatum (**Fig. 3G, I**; cluster-based permutation test, 200 permutations,  $P < 0.05$ ,  $n = 10$ ; %  
197 change in firing rates: PPN,  $62.05 \pm 7.4$ ; LDT,  $52.54 \pm 16.2$ ; CINs,  $-50.17 \pm 5.2$ ; one-way  
198 ANOVA  $F(2,41) = 28.19$ ,  $P = 0.00001$ ; Bonferroni *post hoc* analysis: CIN vs LDT  $P = 0.0001$ ,  
199 CIN vs PPN  $P = 0.0001$ , LDT vs PPN  $P = 1.0$ ). Notably, the latency for producing a significant  
200 excitation by PPN afferents was shorter than that provided by LDT afferents (same analysis as  
201 above; 0.57 s for PPN after laser onset, gray bar, **Fig. 3C**, and 3.07 s for LDT after laser onset,  
202 red bar, **Fig. 3F**). Furthermore, the inhibition of CINs following the stimulation of axons  
203 belonging to neighboring CINs was shorter in latency (0.19 s after laser onset, blue bar, **Fig. 3I**)  
204 and similar to their inhibitory modulation of SPNs. In contrast to the inhibition in SPNs, which  
205 was observed to extend beyond the end of the light stimulation period, the effects on CINs (both

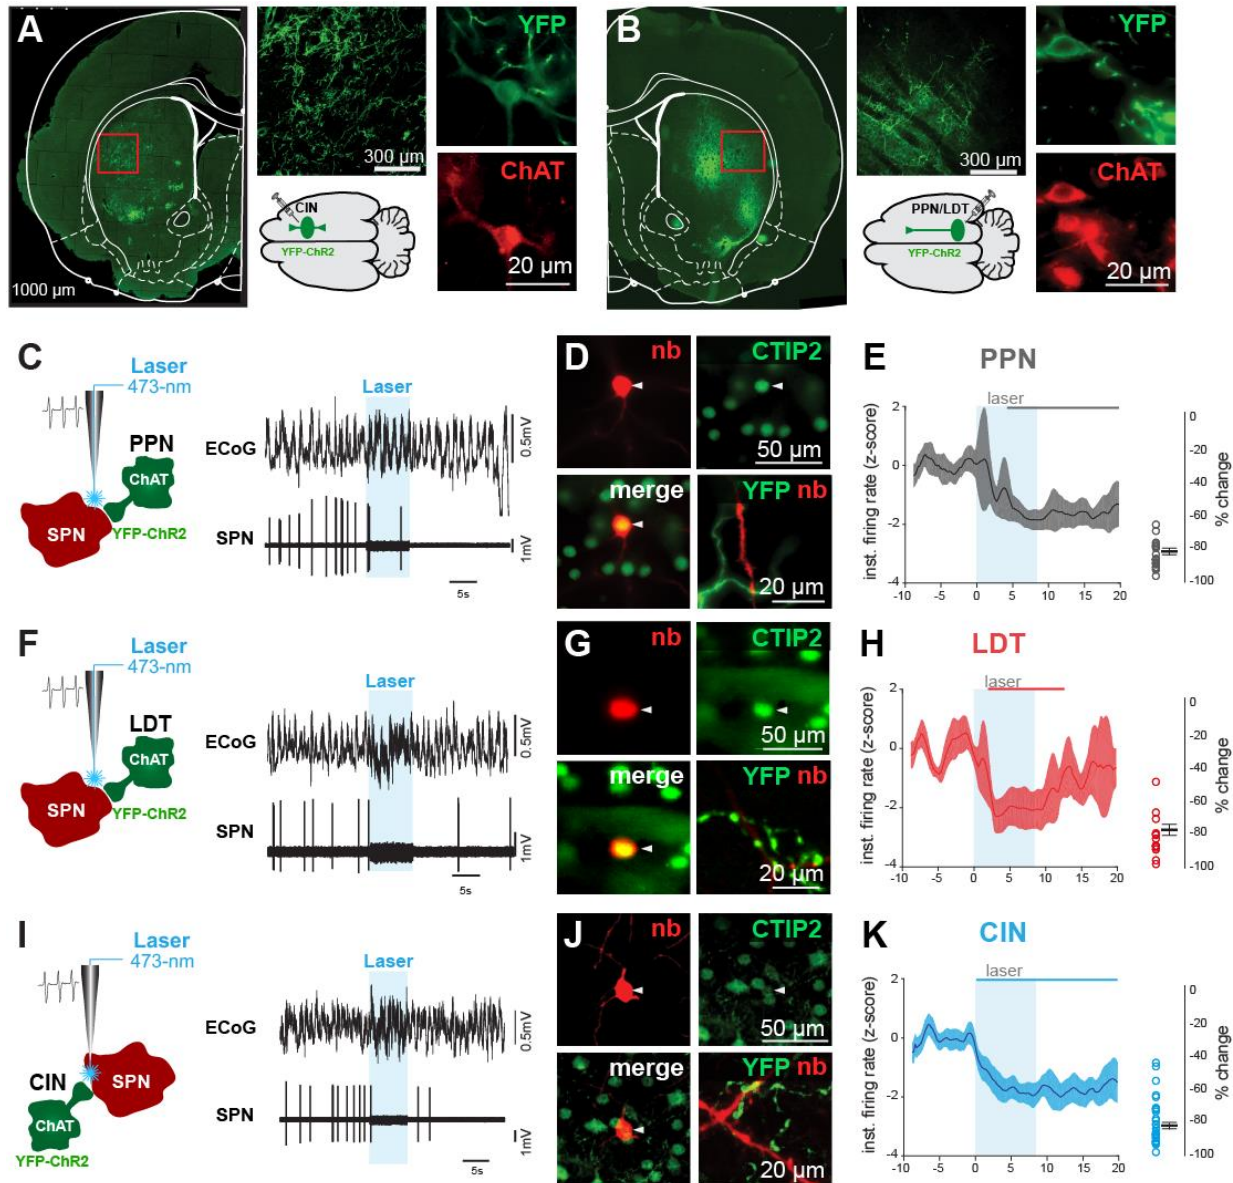

**Figure 2: Cholinergic modulation of striatal spiny projection neurons (SPN)**

(A) Transduction of striatal cholinergic interneurons (CINs) in ChAT::cre+ rats with channelrhodopsin-2 (ChR2) show dense axonal labeling in the striatum and YFP-positive somata that were immunopositive for ChAT.

(B) Transduction of PPN and LDT cholinergic neurons in ChAT::cre+ rats with ChR2 show patches of dense axonal innervation in the striatum and YFP+/ChAT+ somata in the PPN or LDT.

(C) Individual SPN neurons activity was recorded *in vivo* with a glass pipette during optogenetic activation (8s, 10 Hz, 50-ms pulses) of PPN cholinergic axons, and were subsequently labeled with neurobiotin (n = 29 neurons from n = 12 rats). (D) Only neurobiotin labeled SPNs immunopositive for CTIP2 and surrounded by YFP-positive axons were used for further analyses. (E) The normalized instantaneous firing rate of all SPNs that responded to laser stimulation of PPN cholinergic axons shows a slow inhibition during, and after, blue-light stimulation (color line in the top represents the time points during which the responses were significantly different from the baseline; cluster-based permutation test,  $P < 0.05$ ).

(F-H) Same experimental design to assess modulation of striatal SPNs by LDT cholinergic axons (n = 19 neurons from n = 15 rats). LDT cholinergic axon stimulation induced a reduction in the firing rate of SPNs, similar to PPN cholinergic axon stimulation.

(I-K) Same experimental design to assess modulation of striatal SPNs by cholinergic axons arising from local CINs in the dorsal striatum (n = 43 neurons from n = 17 rats). CINs axon stimulation induced a reduction in the firing rate of SPNs, similar to the responses of the brainstem.

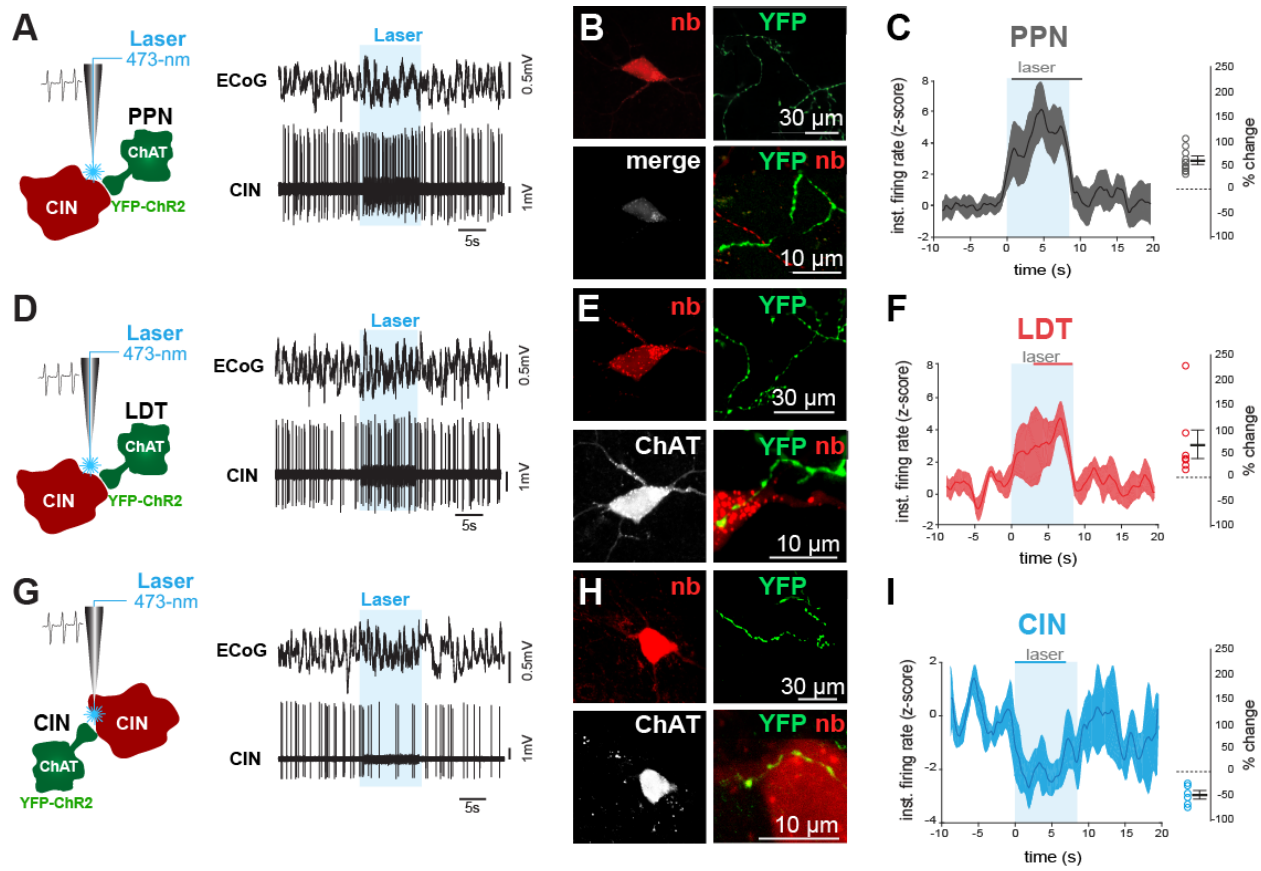

**Figure 3: Cholinergic modulation of cholinergic interneurons (CINs)**

Individual CINs activity was recorded *in vivo* during optogenetic activation (8s, 10 Hz, 50-ms pulses) of cholinergic axons originating in the PPN (A-C; n = 19 neurons), LDT (D-F; n = 13 neurons) or from local CINs (G-I; n = 10 neurons), and were subsequently labeled with neurobiotin. Only neurobiotin-labeled CINs that were immunopositive for ChAT and surrounded by YFP-positive axons were used for further analyses (B, E, H). The normalized instantaneous firing rate of all CINs that responded to laser stimulation of PPN (C) and LDT (F) show similar increase in firing rate shortly after stimulation, whereas non-transduced CINs (YFP/ChR2-negative; I) were strongly inhibited during stimulation (color lines in the top represent the time points during which the responses were significantly different from the baseline; cluster-based permutation test,  $P < 0.05$ ). Similar magnitudes of change were elicited by stimulation of PPN and LDT cholinergic axons.

207

208

209 excitation and inhibition) were shorter and largely restricted to the stimulation period. Further

210 confirmation of the excitatory effect of the cholinergic midbrain on CINs was observed by

211 analyzing the metabolic activity of CINs (see <sup>28</sup>) following PPN/LDT stimulation. Blue light

212 stimulation of midbrain cholinergic axons in the striatum expressing AAV-DIO-ChR2-YFP

213 increased the immunohistochemical detection of the phosphorylated ribosomal protein S6 in

214 CINs (**Fig. S5**) but not if the axons only expressed the reporter. Our results suggest that

215 midbrain cholinergic neurons are able to activate CINs by increasing their firing rate and  
216 increasing their metabolic activity.

217 Neurons expressing PV did not show a significant effect to the optogenetic stimulation of  
218 cholinergic axons originated in either CINs or in the midbrain ( $n = 28$  neurons, % change: PPN =  
219  $-3.8 \pm 64.4$ , LDT =  $-9.35 \pm 38.4$ , CIN =  $2.01 \pm 24.8$ ; one-way ANOVA  $F(2,26) = 0.16$ ,  $P = 0.8541$ ;  
220 **Fig. S6**). While a fraction of PV neurons showed an inhibitory response during the laser  
221 stimulation, this response was not consistent across recordings and showed a large variability.

222 Altogether, the results from the *in vivo* electrophysiology demonstrate that midbrain cholinergic  
223 neurons have a differential effect on the dynamics of striatal neurons and their firing rates,  
224 inhibiting SPNs and exciting CINs. Furthermore, our data suggest that two functionally distinct  
225 sources of ACh operate in the striatum, and that the modulation of CINs seems to be at the  
226 center of these differences.

227

### 228 **Striatal circuit effects of midbrain cholinergic activation**

229 Given the evidence of connectivity of PPN/LDT axons with CINs and the differences between  
230 PPN/LDT and CINs in their latencies to inhibit SPNs, we then examined whether the inhibitory  
231 effects of PPN/LDT on SPNs could be mediated by their excitatory effects on CINs. In a  
232 different set of experiments, we transduced PPN/LDT cholinergic neurons with ChR2 and  
233 transduced CINs with halorhodopsin (AAV-DIO-mCherry-NpHR3.0; **Fig. 4A**). We recorded the  
234 activity of striatal neurons (**Fig. S7**;  $n = 7$  ChAT::cre+ rats) using high-density electrodes (silicon  
235 probes) and delivered alternating trains of blue and yellow light, or their combination, in order to  
236 activate ChR2 and/or NpHR. Only neurons recorded within the vicinity of midbrain (YFP) and  
237 CIN axons (mCherry), as determined by the tracks of the electrode penetration (**Fig. S7A**), were  
238 used for further analysis ( $n = 132$  single units). We defined the putative nature of recorded



239 neurons based on their firing rate, action potential duration and coefficient of variation, as  
240 previously described (27,29; see methods). In line with our results above, putative CINs (pCIN,  
241 average firing rate:  $1.93 \pm 0.38$  Hz;  $n = 8$ ; **Fig. S7C**) were activated by blue light (ChR2;  
242 PPN/LTD axons), strongly inhibited by yellow light (NpHR expressed in CINs) and failed to  
243 activate during concurrent blue and yellow light stimulation (**Fig. 4B-C, Fig. S7D**; % change of  
244 the firing rates during laser stimulation: blue light:  $83.10 \pm 32.09$  % increase; yellow light:  $71.19$   
245  $\pm 5.61$  % reduction; blue and yellow light:  $6.97 \pm 22.22$  % reduction). In addition, putative SPNs  
246 (pSPNs; average firing rate:  $1.09 \pm 0.09$  Hz,  $n = 33$ ; **Fig. S7B**) were inhibited by blue light  
247 (ChR2 expressed in PPN/LTD axons; cluster-based permutation test, 200 permutations,  $P <$   
248  $0.05$ ; **Fig. 4B-C**). No significant effects on the firing of pSPNs were observed during yellow light  
249 stimulation (NpHR expressed in CINs;  $11.019 \pm 57.61$  %; cluster-based permutation test, 200  
250 permutations,  $P = 0.765$ ). During concurrent blue and yellow light stimulation, the inhibitory  
251 response of pSPNs was attenuated (cluster-based permutation test, 200 permutations,  $P <$   
252  $0.05$ ), although it did not disappear (**Fig. 4B-C**; % of firing rates changes during laser  
253 stimulation: blue light:  $-85.07 \pm 1.38$  %; blue and yellow light:  $-61.40 \pm 15.46$  %; paired t-test,  
254  $t(42) = -9.744$ ,  $P = 2.48 \times 10^{-12}$ ) and the duration was markedly reduced (as revealed by the  
255 cluster permutation test, compare blue and green bars). These data suggest that the inhibition  
256 of SPNs originating from midbrain cholinergic axons is in part mediated by CINs.

257 To identify the contribution of ACh to the PPN/LDT-mediated inhibition of SPNs, we used a  
258 combined approach using *in vivo* electrophysiology, pharmacology and optogenetics in  
259 urethane-anesthetized rats ( $n = 7$ ), where a small cannula (to deliver acetylcholine receptor  
260 antagonists) and an optic fiber (to deliver blue light) were attached to an extracellular tungsten  
261 electrode ( $\sim 200$ - $400$   $\mu\text{m}$  from the recording site; **Fig. 4D**). Individual pSPNs (firing rate  $< 1$  Hz  
262 and action potential  $< 2$  ms;  $n = 7$  neurons) were recorded during their baseline activity and  
263 subsequently during the stimulation of PPN/LDT terminals with blue light to activate ChR2. If

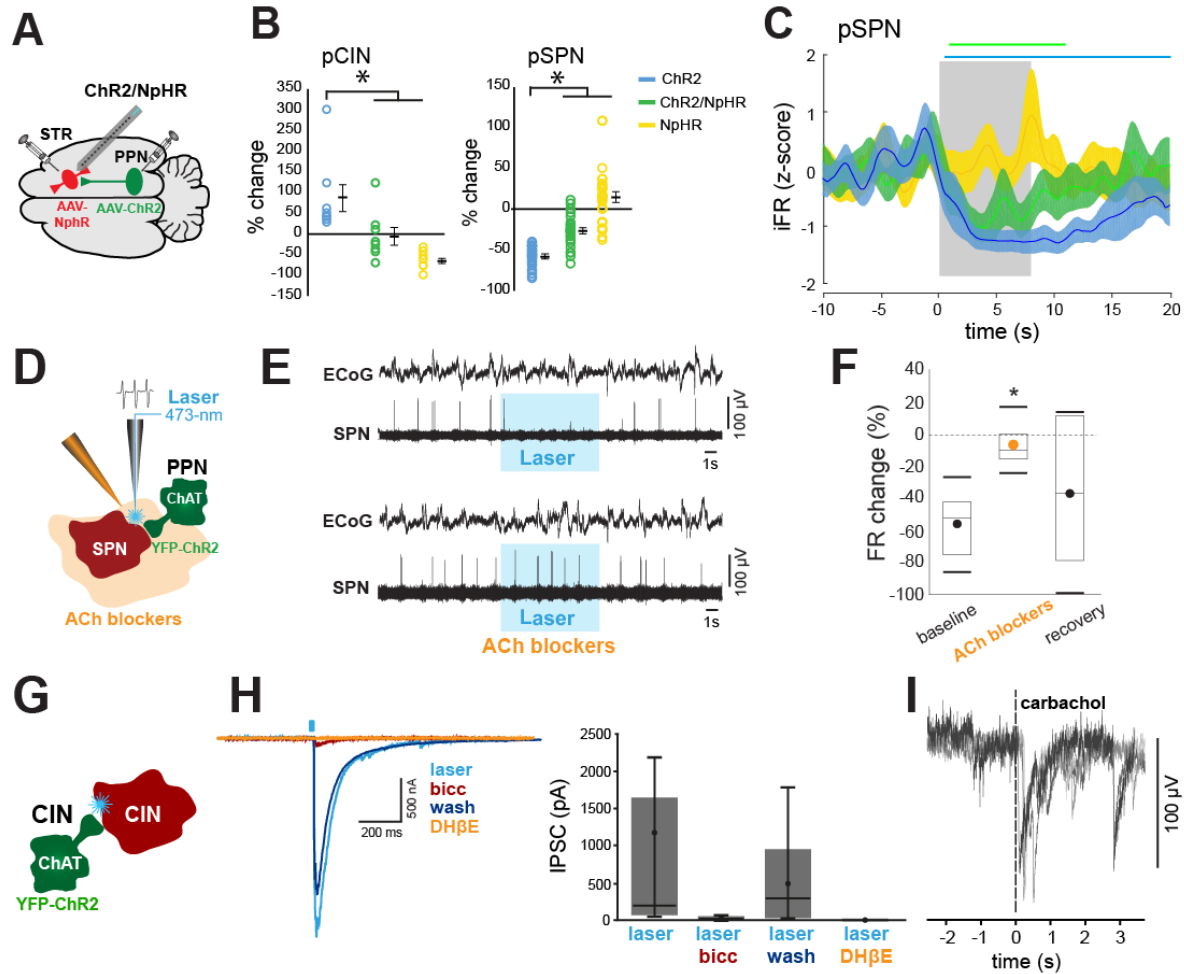

**Figure 4: Optogenetic and pharmacological dissection of the cholinergic mechanisms that are regulated by the PPN and LDT**

(A) Schematic of the *in vivo* optogenetic experiment design for extracellular recordings of striatal neurons in ChAT::Cre rats transduced with ChR2 in the brainstem and halorhodopsin (NpHR) in the striatum.

(B) Percentage change in the firing rates of pCIN and pSPN during stimulation of brainstem axons transduced with ChR2 (blue, 8s, 10 Hz, 50-ms pulses, 5-7 mW), CIN transduced with NpHR (yellow, 8s continuous, 3-4 mW), or both simultaneously (green). The firing rate of CINs was significantly higher during blue light (ChR2 activation) than during yellow (NpHR activation) or blue/yellow light ( $P < 0.05$ , see text for statistical values). The firing rate of SPNs was significantly lower during blue light compared to yellow and green light ( $P < 0.05$ , see text for statistical values). Individual data points and mean  $\pm$  SEM are shown.

(C) Normalized instantaneous firing rate of all pSPN following stimulation of brainstem axons (blue), inhibition of CINs (yellow), or both simultaneously (green) (color lines in the top represent the time points during which the responses were significantly different from the baseline; cluster-based permutation test,  $P < 0.05$ ). The inhibition of pSPNs by brainstem axons thus seem to depend on the activity of CINs.

(D) Schematic of the *in vivo* optogenetic and pharmacological experiment design for extracellular recordings of striatal neurons in ChAT::Cre rats transduced with ChR2 in the brainstem and a mixture of acetylcholine antagonists (see text for details) applied through an adjacent glass pipette.

(E-F) Individual SPNs that were observed to decrease their firing rate during the ChR2-mediated activation of PPN cholinergic axons, did not decrease their activity in the presence of cholinergic blockers ( $n = 7$  neurons from  $n = 7$  rats; E, representative example; F, group data).

(G) Schematic of the *in vitro* optogenetic experiment design for whole cell recordings of CINs in ChAT::Cre mice transduced with ChR2 in the striatum.

(H) Whole cell voltage clamp ( $V_h = -70$  mV) recording of identified, non-transduced CINs following optogenetic stimulation of ChR2 (5ms, 450nm) showing consistently IPSCs driven by neighboring CINs axons ( $n = 9$  neurons). IPSCs were strongly reduced by bath application of bicuculline ( $n = 6$  neurons) or a type II nicotinic receptor blocker (DH $\beta$ E,  $n = 4$  neurons).

(I) Representative example of whole cell voltage clamp recording ( $V_h = -70$  mV) of an identified CIN ( $n = 9$  neurons) receiving a local puff of carbachol (100-250  $\mu$ M, 1 puff per 3 min).



265 pSPNs responded to the stimulation, a cocktail of nicotinic and muscarinic antagonists (100nl in  
266 aCSF, 20 mM methyllycaconitine, 40 mM dihydro- $\beta$ -erythroidine, 40 mM atropine and 100  $\mu$ M  
267 mecamlamine; see <sup>22</sup>) was infused and the response to the laser was tested again 15 min after  
268 the infusion (**Fig. 4E**). pSPNs that decreased their firing rate as a result of the blue light  
269 stimulation ( $-56.25 \pm 7.47\%$ ) showed a diminished inhibition in the presence of cholinergic  
270 blockers ( $-7.2 \pm 4.9\%$ ; 15 min after drug delivery; **Fig. 4F**). The inhibition to the laser was  
271 partially recovered ~45 minutes after the drug application ( $-36.15 \pm 16.37\%$ ; one-way ANOVA  
272  $F(2,20) = 5.24$ ,  $P = 0.0161$ ; Bonferroni *post hoc* analyses: before vs during  $P = 0.014$ , before vs  
273 after  $P = 0.611$ , during vs after  $P = 0.221$ ).

274 Finally, to determine the effects of the optogenetic activation of cholinergic axons, we used an  
275 *ex vivo* approach. Cholinergic neurons of the PPN or striatum of ChAT::Cre+ mice were  
276 transduced with ChR2-YFP and recorded *in vitro* (**Fig. 4G**). We observed an inhibitory response  
277 in YFP-negative CINs when axons of neighboring YFP-positive CINs were activated (blue laser,  
278 5 ms pulse; **Fig. 4H**), in line with our *in vivo* experiments (see **Fig. 3**) and with previous reports  
279 <sup>30</sup>. This inhibitory response was abolished in the presence of bicuculine or DH $\beta$ E (**Fig. 4H**),  
280 suggesting a disynaptic mechanism mediated by GABAergic interneurons <sup>31</sup>. We were unable to  
281 detect any effect of PPN/LDT cholinergic stimulation in the slice (as also observed in other PPN  
282 targets, such as in the thalamus [unpublished data], the VTA [<sup>22</sup>], or even locally in the PPN; see  
283 also <sup>32</sup>), probably due to a low preservation of PPN cholinergic axons in the slice. Nevertheless,  
284 local administration of carbachol to CINs in the presence of glutamate blockers (CNQX and AP5  
285 10 $\mu$ M) and a muscarinic blocker (atropine 0.5 $\mu$ M) produced large excitatory currents in 4 of the  
286 11 CINs recorded, possibly mediated by nicotinic receptors (**Fig. 4I**; see also <sup>33</sup>). Our results  
287 altogether suggest that PPN/LDT cholinergic axons inhibit SPNs through a combined effect that  
288 is partly mediated by CINs, and directly excite CINs through a potential nicotinic effect.  
289 Additional mechanisms are likely to contribute to these circuit effects, such as the pre-synaptic

290 activation of corticostriatal or thalamostriatal terminals<sup>34,35</sup>, or the activation of other types of  
291 GABAergic interneurons<sup>36</sup>. Further experiments are necessary to understand the full extent of  
292 the midbrain effects on striatal circuits.

293

## 294 **Encoding of behavior by cholinergic systems in the striatum**

295 Cholinergic transmission in the striatum has been associated with updating of action-outcome  
296 associations. CINs have been shown to facilitate the integration of new learning into old  
297 strategies, whereas cholinergic PPN neurons seem to be involved in behavioral shifting and  
298 updating the behavioral state triggered by changing contingencies<sup>24</sup>, thus having a seemingly  
299 convergent function. In order to interrogate the contribution of the midbrain cholinergic system in  
300 striatal-dependent behavior, we used a chemogenetic strategy to inhibit the local release of  
301 acetylcholine in the striatum<sup>37</sup> during the acquisition of an instrumental lever-press task that  
302 reveals action-shifting between goal-directed and habitual strategies<sup>38-41</sup>. Thus, ChAT::Cre+  
303 and wild-type rats were injected with AAV-DIO-hM4Di-HA-mCherry into the PPN, LDT,  
304 dorsolateral or dorsomedial striatum (**Fig. S8A**). Bilateral cannulas were implanted in the  
305 dorsolateral (for DLS and PPN groups) or dorsomedial striatum (for DMS and LDT groups) for  
306 intracerebral delivery of clozapine-N-oxide (CNO; **Fig. S8D**), which binds and activates the  
307 transduced hM4Di receptors (associated with the Gi protein) and significantly reduces cell firing  
308 in cholinergic neurons, as demonstrated in slice recordings (paired t-test,  $t(6) = 3.677$ ,  $P =$   
309  $0.0104$ , **Fig. S9**). Before each training session, rats received intrastriatal infusions of CNO (1.5  
310  $\mu\text{M}$ , 250 nl, 30 min before), which was calculated to diffuse 300-500  $\mu\text{m}$  from the tip of the  
311 cannula, as revealed by fluorogold injections at the end of the experimental procedure (**Fig. S8**  
312 **D-E**). Rats were trained to press a lever to obtain a reward in a random ratio (RR) schedule and  
313 then switched to a random interval (RI) schedule (**Fig. S10A**); the former has been associated

314 with the formation of goal-directed behavior whereas the latter has been associated with the  
315 formation of habitual behavior (**Fig. S10B-C**).

316 The control group consisted of wild-type rats receiving the same manipulations (i.e., viral  
317 injection, cannulation, and CNO delivery) and training as the experimental group. Animals  
318 showing histological signs of striatal lesions in any group were not considered for further  
319 analysis. No differences due to CNO (versus saline) infusion were observed in any group [WT  
320 and ChAT::cre+ rats, each virally transduced in the DLS, DMS, PPN or LDT] in locomotor  
321 activity (**Fig S10D-E**), evaluated as total distance travelled (two-way ANOVA group x drug:  $F_{\text{group}}$   
322  $(3,35) = 1.69, P = 0.1924$  ;  $F_{\text{drugs}}(1,35) = 1.86, P = 0.1840$ ;  $F_{\text{interaction}}(3,35) = 0.92, P = 0.4461$ )  
323 and distance in center of the open field (two-way ANOVA group x drugs condition:  $F_{\text{group}}(3,35) =$   
324  $1.06, P = 0.3820$ ;  $F_{\text{drugs}}(1,35) = 0.61, P = 0.4429$ ;  $F_{\text{interaction}}(3,35) = 2.48, P = 0.0815$ ). No  
325 changes were detected either in sugar consumption (two-way ANOVA groups x drugs:  
326  $F_{\text{group}}(4,99) = 1.94, P = 0.11$ ,  $F_{\text{drugs}}(1,99) = 0.001, P = 0.96$ ,  $F_{\text{interaction}}(4,99) = 0.08, P = 0.99$ ),  
327 suggesting that midbrain cholinergic terminals targeting other structures were not affected (see  
328 <sup>42</sup>). During training, the number of lever presses during RR showed incremental changes in all  
329 groups (**Fig. 5A**), whereas during RI they remained constant (**Fig. 6A**), consistent with  
330 previously reported data <sup>43,44</sup>. All animals were then tested in an outcome devaluation task,  
331 consisting of two counterbalanced sessions carried out over two consecutive days: a 'valued'  
332 session where rats were fed rat chow but no sugar pellets (the instrumental outcome)  
333 immediately before testing (maintaining a high motivational state for the outcome) and a  
334 'devalued' session where rats were fed sugar pellets before testing (thus devaluing the  
335 instrumental outcome). While goal-directed behavior is expected to be sensitive to the  
336 motivational changes of the devalued session, resulting in a reduction in the number of lever  
337 presses, habitual behavior is not expected to be affected by pre-exposure to the instrumental

338 outcome and therefore lever pressing in the devalued session should not be significantly  
339 reduced<sup>38,39,45</sup>.

340 Following RR training, WT animals showed a higher number of lever presses in the valued  
341 session compared to the devalued session with a significant effect on the session factor (two-  
342 way ANOVA group [DLS, DMS, LDT, PPN] X session [valued, devalued];  $F_{\text{group}}(3,39) = 2.71, P = 0.0615$ ;  
343  $F_{\text{session}}(1,39) = 365.33, P = 0.00001$ ;  $F_{\text{interaction}}(3,39) = 0.73, P = 0.54$ ). In contrast, following RI  
344 training, the same animals showed no significant differences in the number of lever presses in  
345 the valued and devalued sessions (two-way ANOVA:  $F_{\text{group}}(3,39) = 1.18, P = 0.333$ ;  
346  $F_{\text{session}}(1,39) = 0.10, P = 0.7546$ ;  $F_{\text{interaction}}(3,39) = 0.26, P = 0.8534$ ). To illustrate differences in  
347 the proportion of responses during the devaluation tests within subjects, we analyzed the  
348 normalized number of presses between test sessions (see Methods; **Fig. 5B, 6B**), and  
349 calculated the difference between valued and devalued responses as an index that reveals the  
350 ability of animals to adjust their responses after training in each schedule (**Fig. S11**). Following  
351 RR training sessions, control animals showed a strong preference to seek the instrumental  
352 outcome in the valued condition compared to the devalued condition, denoting a bias towards  
353 goal-directed behavior (two-way ANOVA group x condition:  $F_{\text{group}}(3,39) = 0.001, P = 1$ ;  
354  $F_{\text{session}}(1,39) = 401.35, P = 0.00001$ ,  $F_{\text{interaction}}(3,39) = 0.82, P = 0.4927$ ), whereas following RI  
355 training sessions, they did not show any preference, denoting a bias towards habitual behavior,  
356 thus revealing two fundamentally distinct forms of encoding action-outcome associations (two-  
357 way ANOVA group x session:  $F_{\text{group}}(3,39) = 1.73, P = 0.1803$ ;  $F_{\text{session}}(1,39) = 15.79, P = 0.0004$ ,  
358  $F_{\text{interaction}}(3,39) = 2.23, P = 0.1036$ ).

359 Next, we interrogated the contribution of acetylcholine to this behavior in two striatal regions  
360 (dorsolateral and dorsomedial) in the ChAT::cre animals compared to the WT animals. Because  
361 there was no difference in the number of lever presses between control groups (i.e. associated  
362 to the brain region targeted), the WT data was pooled into one single control group for the

363 following analyses. We inhibited cholinergic transmission from axons arising in dorsolateral  
364 CINs (**Fig. 5C**), PPN (**Fig. 5D**), dorsomedial CINs (**Fig. 5E**) or LDT (**Fig. 5F**). No effect of group  
365 or interaction was observed in the response rates during RR training (two-way ANOVA group  
366  $[\text{WT, DLS, DMS, LDT, PPN}] \times \text{day}$ :  $F_{\text{group}}(4,199) = 2.21, P = 0.0696$ ;  $F_{\text{day}}(3,199) = 21.73, P = 0.00001$ ;  
367  $F_{\text{interaction}}(12,199) = 0.35, P = 0.9780$ ). After RR training, most animals showed a significant  
368 reduction in lever pressing in the devalued session relative to the valued session, similar to the  
369 reduction in WT (two-way ANOVA group  $\times$  session:  $F_{\text{group}}(4,99) = 3.48, P = 0.0109$ ,  $F_{\text{session}}(1,99)$   
370  $= 54.58, P = 0.00001$ ;  $F_{\text{interaction}}(4,99) = 4.52, P = 0.023$ ). *Post hoc* pairwise comparisons  
371 (Tukey's) revealed a significant difference in lever presses (devalued vs valued) in WT ( $P <$   
372  $0.0001$ ), DLS ( $P < 0.0001$ ), DMS ( $P = 0.003$ ) but not in LDT ( $P = 1$ ) or PPN ( $P = 0.518$ ) groups.  
373 The normalized number of presses also revealed a significant interaction (two-way ANOVA  
374 group  $\times$  session,  $F_{\text{group}}(4,99) = 0.001, P = 1$ ;  $F_{\text{session}}(1,99) = 429.47, P = 0.00001$  and  
375  $F_{\text{interaction}}(4,99) = 23.29, P < 0.00001$ ) with *post hoc* pairwise comparisons (Tukey's) showing  
376 significant effects in the WT ( $P < 0.0001$ ), DLS ( $P < 0.0001$ ), DMS ( $P < 0.0001$ ) and PPN ( $P <$   
377  $0.0001$ ) but not LDT ( $P = 1$ ) groups (**Fig. 5B-F**). Thus, animals in the LDT group showed  
378 virtually the same proportion of lever presses during both valued and devalued sessions  
379 suggesting reduced expression of goal-directed behavior (**Fig. 5F**). In other words, when  
380 acetylcholine release in the DMS arising from LDT terminals was disrupted during RR training,  
381 rats failed to associate the outcome with the instrumental action that produced it and were  
382 therefore insensitive to reward devaluation. This effect was evident by the absence of shift in the  
383 devaluation index in LDT despite the different training conditions (**Fig. S11**).

384

385

386

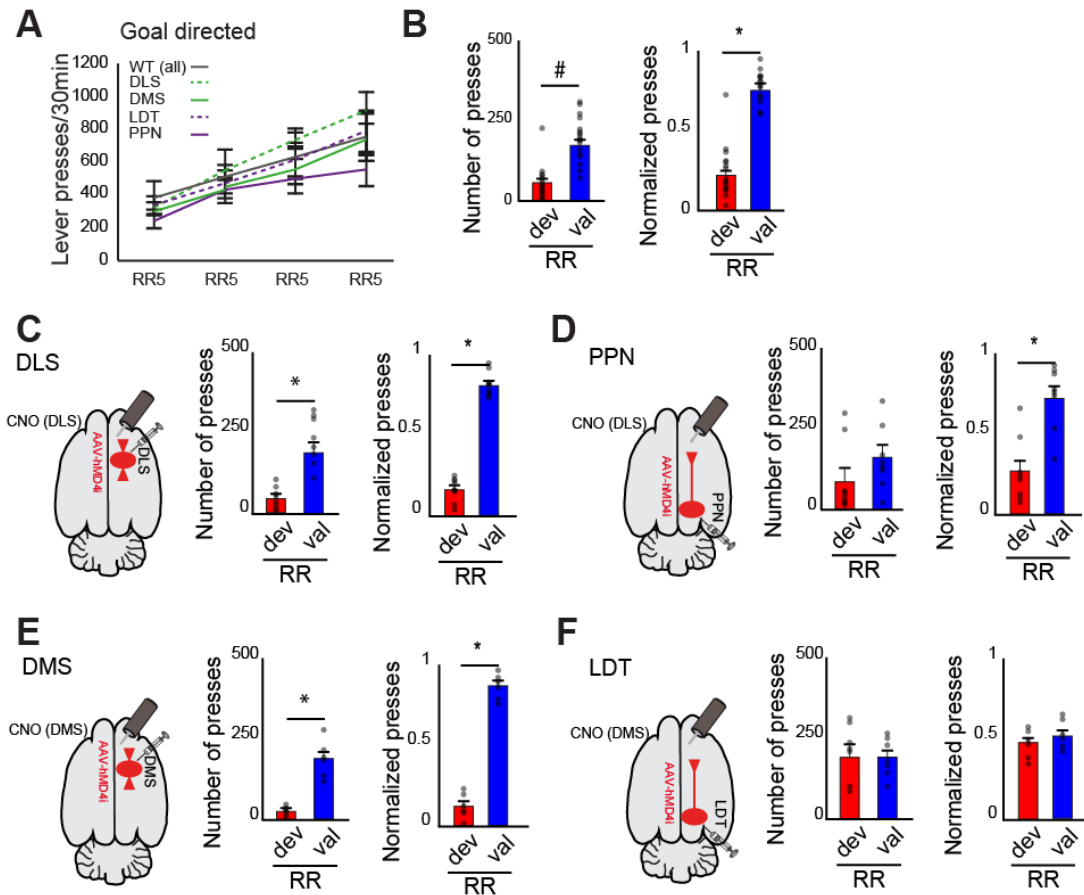

**Figure 5: Blocking of LDT cholinergic transmission in the striatum impairs goal-directed action control**

(A) Lever pressing during acquisition of goal-directed behavior shows no significant difference between groups (see text for details).

(B-F) Number of presses and normalized lever presses during outcome devaluation testing across valued (val) or devalued (dev) states in random ratio schedule (RR; goal-directed). Control animals (WT, B) and ChAT::Cre animals were injected in the DLS (C), PPN (D), DMS (E) or LDT (F). During RR, significant differences in goal-directed devaluation were observed in all groups except LDT, suggesting that inhibition of LDT axons prevents animals from switching to goal-directed behavior.

387 Individual data points and mean  $\pm$  SEM are shown. \*  $P < 0.05$ .

388

389 Finally, following retraining in the absence of CNO administration, we tested the effects of  
 390 cholinergic transmission on habitual learning in the same group of animals (**Fig. 6**). During RI  
 391 training (**Fig. 6A**), no effect of group, day or interaction was observed in the response rates  
 392 (two-way ANOVA group  $\times$  day:  $F_{\text{group}}(4,399) = 2.30$ ,  $P = 0.0581$ ,  $F_{\text{day}}(7,399) = 0.98$ ,  $P = 0.4437$ ;  
 393  $F_{\text{interaction}}(28,399) = 0.36$ ,  $P = 0.9991$ ). Animals in the dorsomedial striatum and LDT groups  
 394 showed no significant differences in the number of lever presses during the valued and



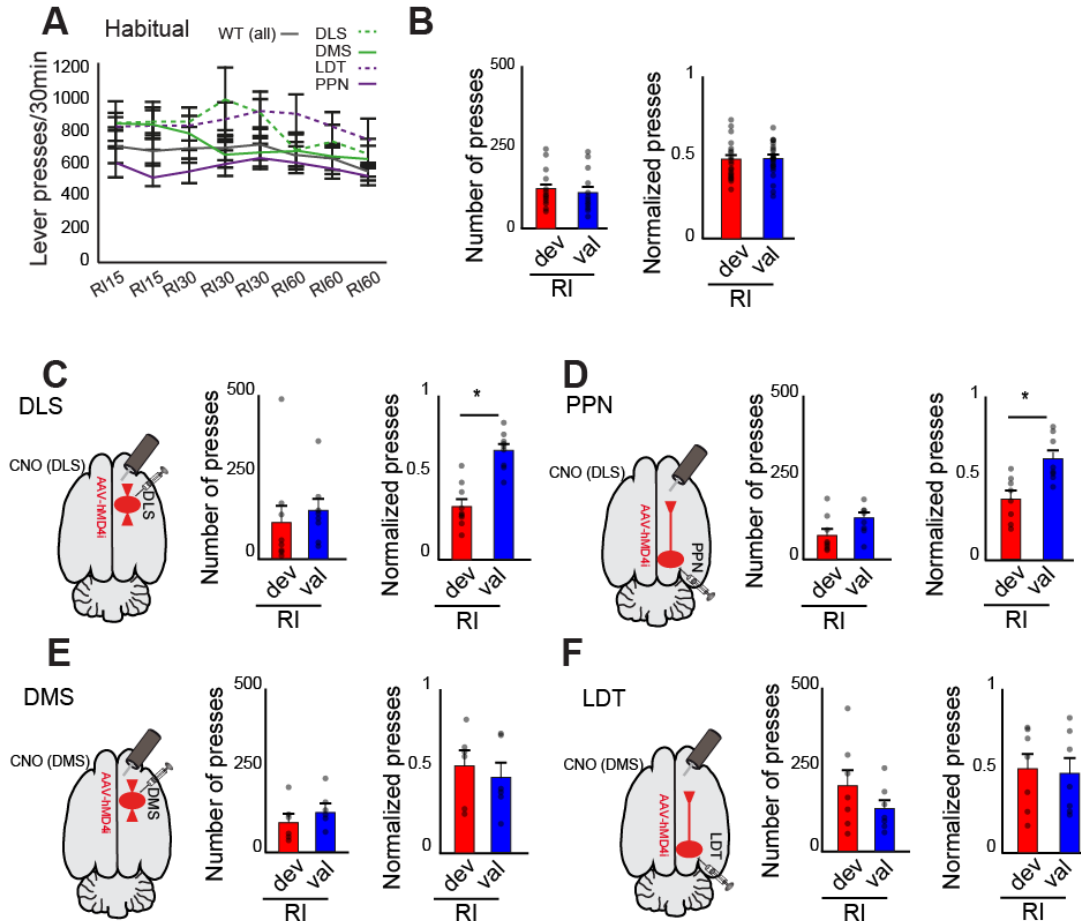

**Figure 6: Blocking of cholinergic transmission in the dorsal striatum impairs habitual action control**

A) Lever pressing during acquisition of habitual behavior shows no significant difference between groups (see text for details).

(B-F) Number of presses and normalized lever presses during outcome devaluation testing across valued (val) or devalued (dev) states in random interval schedule (RI; habitual). Control animals (WT, B) and ChAT::Cre animals were injected in the DLS (C), PPN (D), DMS (E) or LDT (F). During RI, significant devaluation was observed in DLS and PPN groups (D and F), suggesting that inhibition of PPN and DLS CINs axons prevent animals from switching to habitual learning.

395 Individual data points and mean  $\pm$  SEM are shown. \*  $P < 0.05$ .

396

397 devalued sessions, as controls did, suggesting that habitual behavior encoding remained intact

398 (**Fig. 6E, F**) (two-way ANOVA: groups x condition [valued vs devalued],  $F_{\text{group}}(4,99) = 1.34$ ,  $P = 0.26$ ,

399  $F_{\text{condition}}(1,99) = 0.445$ ,  $P = 0.5019$ ;  $F_{\text{interaction}}(4,99) = 0.71$ ,  $P = 0.58$ ). However, there was a

400 significant interaction in the normalized number of presses (two-way ANOVA groups x condition:

401  $F_{\text{group}}(4,99) = 0.001$ ,  $P = 1$ ;  $F_{\text{condition}}(1,99) = 10.06$ ,  $P = 0.0021$ ;  $F_{\text{interaction}}(4,99) = 5.79$ ,  $P =$

402 0.0003), and *post hoc* pairwise comparisons (Tukey's) revealed a significant difference of

403 normalized lever press (devalued vs valued) in DLS ( $P = 0.001$ ; **Fig. 6C**) and PPN ( $P = 0.018$ ;  
404 **Fig. 6D**), but not for WT ( $P = 1$ ; **Fig. 6B**), DMS ( $P = 0.316$ ; **Fig. 6E**) and LDT ( $P = 1$ ; **Fig. 6F**).  
405 This suggests that rats in the dorsolateral striatum and PPN groups failed to shift to a habitual  
406 responding state and remained goal-directed, as suggested by reduced lever-pressing in the  
407 devalued session compared to the valued session. Thus, reduced cholinergic transmission in  
408 the dorsolateral striatum, regardless of its origin (i.e., CINs and PPN), impairs the ability of rats  
409 to form habitual behavior, thus revealing that cholinergic neurons from the midbrain have a  
410 critical role in normal striatal operations.

411

## 412 **Discussion**

413 Cholinergic transmission in the striatum powerfully modulates striatal output<sup>46</sup>, the activity of  
414 striatal interneurons<sup>30,36,47</sup>, the release of glutamate from cortical terminals<sup>1</sup> and the release of  
415 dopamine from mesostriatal terminals<sup>48,49</sup>. We present here, detailed evidence of the  
416 functionality of a hitherto uncharacterized source of acetylcholine in the striatum originating in  
417 the midbrain. We show that cholinergic neurons of the PPN and LDT provide direct innervation  
418 of CINs and direct and indirect pathway neurons. We show that PPN and LDT axon terminals  
419 inhibit the activity of SPNs while activating CINs, suggesting a circuit mechanism in which  
420 PPN/LDT can modulate striatal activity through CINs. Finally, we show that inhibition of  
421 cholinergic transmission from either PPN, LDT or CINs impairs shifts in action control,  
422 suggesting that cholinergic transmission from the midbrain is necessary for normal encoding of  
423 behavior.

424

## 425 **Two functionally distinct cholinergic systems interacting in the striatum**

426 Our results show that PPN and LDT cholinergic neurons inhibit the firing of SPNs with a similar  
427 magnitude as CINs, suggesting overlapping actions. Because PPN and LDT preferentially  
428 contact CINs over SPNs (as supported by both electron microscopy and monosynaptic rabies  
429 labeling), and because their latency for activating CINs is shorter than for inhibiting SPNs, we  
430 hypothesized that PPN/LDT neurons may be exerting their effects in the striatum partly through  
431 their connections with CINs. The inhibitory effects of the PPN/LDT over SPNs were significantly  
432 reduced but not abolished following the inhibition of CINs and completely abolished following  
433 the infusion of acetylcholine blockers. These results suggest that CINs play a key role in the  
434 modulation of the striatal output by PPN/LDT, but additional mechanisms are likely to contribute  
435 to the cholinergic modulation arising in the midbrain. Such mechanisms may rely on a  
436 monosynaptic modulation of SPNs by PPN/LDT cholinergic axons (as shown by our anatomical  
437 data in Fig. 1 and the evidence of synaptic contacts with dendritic spines in <sup>10</sup>) or through other  
438 GABAergic interneurons (e.g. <sup>31</sup>).

439 The seemingly overlapping effects of cholinergic signaling arising from two different sources  
440 raise the question of whether they are conveying different messages or acting in coordination.  
441 Several differences between striatal CINs and midbrain cholinergic neurons have been reported  
442 in the literature. CINs receive innervation predominantly from cortical areas, including cingulate,  
443 secondary motor and primary somatosensory cortices <sup>50</sup>, and thalamic nuclei including the  
444 parafascicular and centrolateral <sup>51,52</sup>. Inputs to cholinergic midbrain neurons have not been fully  
445 identified, but largely differ from CINs as they predominantly arise in basal ganglia structures,  
446 including the substantia nigra pars reticulata and internal globus pallidus <sup>53,54</sup>; for a review see  
447 <sup>55</sup>. In terms of the physiological properties, CINs possess a high-input resistance (200 M $\Omega$ ) (for  
448 review see <sup>4</sup>) and have been associated with a spontaneous, tonically-active firing mode (3-10  
449 Hz; <sup>56</sup>) that is mediated by inward rectifying potassium currents and a depolarization sag that  
450 induces rebound spike firing <sup>57</sup>. In contrast, PPN cholinergic neurons show a low firing rate *in*

451 *vitro* (2-3Hz), a very high input resistance (600M $\Omega$ ), display an A-current<sup>58</sup>, their firing seems to  
452 be modulated by M-currents<sup>59</sup> and show fast-adaptive firing<sup>18</sup>. *In vivo*, identified PPN  
453 cholinergic neurons have been shown to fire phasically<sup>18,19</sup>. This evidence thus indicates that  
454 midbrain and striatal cholinergic cell groups differ in their afferent connectivity and physiological  
455 properties, suggesting they are modulated differently by their afferents and that their dynamics  
456 are distinct.

457 Another significant difference stems from electrophysiological recordings of putative striatal and  
458 midbrain cholinergic neurons in awake, behaving animals. Tonically-active neurons in the  
459 striatum encode a pause in their firing rate that is associated with behaviorally-relevant salient  
460 events<sup>60,61</sup>, which is correlated with the phasic activation of dopamine neurons in mesostriatal  
461 systems. Importantly, this pause is often preceded by a phasic increase in firing before the  
462 inhibition, mediated in part by thalamostriatal activation<sup>35</sup> and followed by a rebound excitation.  
463 Neurons in the PPN, in contrast, increase their firing rate phasically during sensory cues that  
464 predict reward presentation<sup>62</sup>, presumably driving dopamine transients in the striatum. The  
465 multiphasic response of CINs during behaviorally-relevant salient events suggests the  
466 convergence of multiple synaptic drives that shape the burst-pause-rebound dynamics of CINs.  
467 The direct connectivity and excitatory nature of the midbrain input onto CINs suggest that  
468 PPN/LDT cholinergic neurons contribute to sculpting the response of CINs during behavior.  
469 Further experiments are needed to determine the extent of this modulation.

470

#### 471 **Role of the PPN in adaptive behavior**

472 Our data here also suggest that there are intersecting roles of CINs and PPN/LDT neurons in  
473 cholinergic-mediated striatal behavior. In the dorsolateral striatum, we revealed that inhibition of  
474 cholinergic signaling arising from either CINs or PPN neurons is able to block the transition from

475 goal-directed to habitual behavior, whereas in the dorsomedial striatum inhibition of cholinergic  
476 signaling from LDT neurons is able to block goal-directed behavior. Together with our  
477 anatomical data showing preferential innervation of PPN and LDT neurons over CINs, these  
478 behavioral effects suggest that midbrain cholinergic neurons modulate the activity of CINs  
479 during behavioral switching and action control. Similar changes in the outcome of these tasks  
480 have been obtained following the interruption of the thalamostriatal projections that target CINs  
481 <sup>40</sup> and corticostriatal projections <sup>39</sup>, or following excitotoxic striatal lesions <sup>63</sup>. All the above  
482 suggest that optimal encoding of behavioral information in the striatum is mediated by a series  
483 of factors that converge at the level of the CINs; furthermore, it reveals the role of the PPN as a  
484 key modulator of striatal activity through CINs.

485 In line with our findings, the role of the PPN in adaptive behavior and action control has been  
486 previously addressed by a series of experiments using lesions or pharmacological  
487 manipulations. For example, non-specific PPN lesions impair adaptation to incremental walking  
488 speeds in a motor task <sup>64</sup>, affect assimilation of new strategies with a consequent increase in  
489 perseverant responses <sup>65,66</sup>, and decrease the sensitivity to reward omissions <sup>67</sup>, thus denoting a  
490 failure in adjusting the behavioral state. Furthermore, pharmacological inhibition of the PPN  
491 produces a decrease in the responsiveness to degradation in contingencies between action and  
492 outcome, but did not change it if contingencies remain unchanged <sup>68</sup>, in line with findings  
493 showing impaired ability of rats to adapt to new strategies when the contingencies changed  
494 following inhibition of cholinergic transmission in the striatum <sup>6,69</sup> or CINs lesions <sup>70</sup>. This body of  
495 evidence suggests that interrupting PPN activity has similar effects to those observed following  
496 disruption of cholinergic transmission in the striatum and raises the possibility that PPN is  
497 mediating such response. Our experiments here link these systems together by showing that  
498 interfering with cholinergic transmission in the striatum, regardless of its origin, has similar  
499 functional consequences for action control.

500

501

## 502 **Striatum as a main hub of PPN cholinergic projections**

503 PPN and LDT have divergent ascending cholinergic projections that converge in the striatum  
504 following three different pathways. First, axon collaterals of cholinergic neurons innervate  
505 dopamine neurons in the SNc and VTA <sup>71-73</sup>. Activation of this pathway leads to increased  
506 activity of dopamine neurons that project to the striatal complex <sup>22</sup>. Second, cholinergic neurons  
507 innervate thalamic nuclei that in turn project to the striatum. In particular, PPN densely  
508 innervates the parafascicular nucleus <sup>74-76</sup>, which in turn preferentially targets and modulates  
509 CINs <sup>35,77</sup>. Third, our results here reveal that PPN and LDT cholinergic neurons directly  
510 innervate both SPNs and CINs, with preferential innervation of the latter. The convergence of  
511 three different afferent systems arising from a single cell group in the midbrain puts the PPN in a  
512 key position as modulator of striatal activity and suggests that striatum (whether directly or  
513 indirectly) is the main target of cholinergic PPN projections, as no other PPN target receives  
514 such level of converging afferents from PPN cholinergic neurons. Furthermore, at least a  
515 proportion of these projections originate from the same neurons <sup>10</sup>, potentially indicating the  
516 simultaneous activation of dopamine, thalamic and striatal targets, and suggesting that these  
517 converging effects at the striatum level are inextricably linked.

518 What is the PPN signaling in the striatum and why is it relevant for behavior? PPN neurons have  
519 been shown to have a phasic activation during particular behavioral contexts, such as during  
520 Pavlovian conditioning <sup>78</sup>, reward prediction <sup>79,80</sup> and reward omission <sup>81</sup>. Thus, when these  
521 signals are absent because PPN neurons fail to signal a mismatch between expected and real  
522 contingencies, the behavior is not updated, creating perseverant responses and failure to  
523 integrate new learning with the old learning (see <sup>24</sup>). The activation of CINs may thus underlie



524 the mechanism by which PPN is able to shape striatal output and block ongoing motor  
525 programs at the level of SPNs in order to update the behavioral state and reinforce novel  
526 actions.

527

## 528 **Author contributions**

529 Conceptualization, D.D. and J.M.S.; Methodology, D.D., I.H.O., M.V., K.K., T.G. and J.M.S.;  
530 Behavioral experiments developed in Leicester; Formal analysis, D.D., M.V. and J.M.S.,  
531 Investigation, D.D. and I.H.O.; Writing – Original Draft, D.D. and J.M.S.; Writing – Review &  
532 Editing, D.D., I.H.O., M.V., K.K., T.G. and J.M.S.; Visualization, D.D., I.H.O., M.V., K.K., T.G.  
533 and J.M.S.; Supervision and Funding acquisition, J.M.S.

534

## 535 **Acknowledgments**

536 We thank Paul Bolam for valuable input at different stages of this project. In addition, we also  
537 thank M. Shifflet and N. Gut for comments on this manuscript, M. Condon for some recordings  
538 in the initial stages of this project, and A.M. Aman for assistance in animal training. This  
539 research was supported by NIH grant R01 NS100824 (J.M.S.), a NARSAD Young Investigator  
540 Award (J.M.S.) and Rutgers University. MV acknowledges support from the Departamento de  
541 Salud, Gobierno de Navarra (114/2014) and Spanish Ministry of Education, Culture and Sport  
542 and Fulbright Commission (CAS15/00259).

543

## 544 **References**

545 1. Malenka, R. C. & Kocsis, J. D. Presynaptic actions of carbachol and adenosine on  
546 corticostriatal synaptic transmission studied in vitro. *J Neurosci* **8**, 3750–3756 (1988).

- 547 2. Pakhotin, P. & Bracci, E. Cholinergic interneurons control the excitatory input to the  
548 striatum. *J Neurosci* **27**, 391–400 (2007).
- 549 3. Oldenburg, I. A. & Ding, J. B. Cholinergic modulation of synaptic integration and dendritic  
550 excitability in the striatum. *Curr. Opin. Neurobiol.* **21**, 425–432 (2011).
- 551 4. Lim, S. A. O., Kang, U. J. & McGehee, D. S. Striatal cholinergic interneuron regulation  
552 and circuit effects. *Front. Synaptic Neurosci.* **6**, (2014).
- 553 5. Aoki, S., Liu, A. W., Zucca, A., Zucca, S. & Wickens, J. R. Role of Striatal Cholinergic  
554 Interneurons in Set-Shifting in the Rat. *J Neurosci* **35**, 9424–9431 (2015).
- 555 6. McCool, M. F., Patel, S., Talati, R. & Ragozzino, M. E. Differential involvement of M1-type  
556 and M4-type muscarinic cholinergic receptors in the dorsomedial striatum in task  
557 switching. *Neurobiol Learn Mem* **89**, 114–124 (2008).
- 558 7. Graybiel, A. M., Baughman, R. W. & Eckenstein, F. Cholinergic neuropil of the striatum  
559 observes striosomal boundaries. *Nature* **323**, 625–627 (1986).
- 560 8. Kubota, Y. & Kawaguchi, Y. Spatial distributions of chemically identified intrinsic neurons  
561 in relation to patch and matrix compartments of rat neostriatum. *J. Comp. Neurol.* **332**,  
562 499–513 (1993).
- 563 9. Matamales, M. *et al.* Quantitative Imaging of Cholinergic Interneurons Reveals a  
564 Distinctive Spatial Organization and a Functional Gradient across the Mouse Striatum.  
565 *PLoS One* **11**, e0157682 (2016).
- 566 10. Dautan, D. *et al.* A major external source of cholinergic innervation of the striatum and  
567 nucleus accumbens originates in the brainstem. *J Neurosci* **34**, 4509–4518 (2014).
- 568 11. Cornwall, J., Cooper, J. D. & Phillipson, O. T. Afferent and efferent connections of the  
569 laterodorsal tegmental nucleus in the rat. *Brain Res Bull* **25**, 271–284 (1990).

- 570 12. Lerner, T. N. *et al.* Intact-Brain Analyses Reveal Distinct Information Carried by SNc  
571 Dopamine Subcircuits. *Cell* **162**, 635–647 (2015).
- 572 13. Nakano, K. *et al.* Topographical projections from the thalamus, subthalamic nucleus and  
573 pedunclopontine tegmental nucleus to the striatum in the Japanese monkey, *Macaca*  
574 *fuscata*. *Brain Res* **537**, 54–68 (1990).
- 575 14. Saper, C. B. & Loewy, A. D. Projections of the pedunclopontine tegmental nucleus in the  
576 rat: evidence for additional extrapyramidal circuitry. *Brain Res.* **252**, 367–372 (1982).
- 577 15. Smith, Y. & Parent, A. Differential connections of caudate nucleus and putamen in the  
578 squirrel monkey (*Saimiri sciureus*). *Neuroscience* **18**, 347–371 (1986).
- 579 16. Wall, N., DeLaParra, M., Callaway, E. & Kreitzer, A. Differential innervation of direct- and  
580 indirect-pathway striatal projection neurons. *Neuron* **79**, 347–360 (2013).
- 581 17. Hunnicutt, B. J. *et al.* A comprehensive excitatory input map of the striatum reveals novel  
582 functional organization. *Elife* **5**, (2016).
- 583 18. Petzold, A., Valencia, M., Pal, B. & Mena-Segovia, J. Decoding brain state transitions in  
584 the pedunclopontine nucleus: cooperative phasic and tonic mechanisms. *Front Neural*  
585 *Circuits* **9**, 68 (2015).
- 586 19. Boucetta, S., Cissé, Y., Mainville, L., Morales, M. & Jones, B. E. Discharge profiles  
587 across the sleep-waking cycle of identified cholinergic, GABAergic, and glutamatergic  
588 neurons in the pontomesencephalic tegmentum of the rat. *J. Neurosci.* **34**, 4708–27  
589 (2014).
- 590 20. Cox, J., Pinto, L. & Dan, Y. Calcium imaging of sleep-wake related neuronal activity in the  
591 dorsal pons. *Nat. Commun.* **7**, 10763 (2016).
- 592 21. Furman, M. *et al.* Optogenetic stimulation of cholinergic brainstem neurons during focal

- 593           limbic seizures: Effects on cortical physiology. *Epilepsia* **56**, e198-202 (2015).
- 594   22.   Dautan, D. *et al.* Segregated cholinergic transmission modulates dopamine neurons  
595           integrated in distinct functional circuits. *Nat. Neurosci.* **19**, 1025–1033 (2016).
- 596   23.   Xiao, C. *et al.* Cholinergic Mesopontine Signals Govern Locomotion and Reward through  
597           Dissociable Midbrain Pathways. *Neuron* **90**, 333–347 (2016).
- 598   24.   Mena-Segovia, J. & Bolam, J. P. Rethinking the Pedunclopontine Nucleus: From  
599           Cellular Organization to Function. *Neuron* **94**, 7–18 (2017).
- 600   25.   Callaway, E. M. & Luo, L. Monosynaptic Circuit Tracing with Glycoprotein-Deleted Rabies  
601           Viruses. *J. Neurosci.* **35**, 8979–8985 (2015).
- 602   26.   Tepper, J. M., Abercrombie, E. D. & Bolam, J. P. Basal ganglia macrocircuits. *Progress in*  
603           *Brain Research* **160**, 3–7 (2007).
- 604   27.   Sharott, A., Doig, N. M., Mallet, N. & Magill, P. J. Relationships between the Firing of  
605           Identified Striatal Interneurons and Spontaneous and Driven Cortical Activities In Vivo. *J.*  
606           *Neurosci.* **32**, 13221–13236 (2012).
- 607   28.   Bertran-Gonzalez, J., Chieng, B. C., Laurent, V., Valjent, E. & Balleine, B. W. Striatal  
608           cholinergic interneurons display activity-related phosphorylation of ribosomal protein S6.  
609           *PLoS One* **7**, e53195 (2012).
- 610   29.   Lee, K. *et al.* Parvalbumin Interneurons Modulate Striatal Output and Enhance  
611           Performance during Associative Learning. *Neuron* **93**, 1451–1463.e4 (2017).
- 612   30.   English, D. F. *et al.* GABAergic circuits mediate the reinforcement-related signals of  
613           striatal cholinergic interneurons. *Nat Neurosci* **15**, 123–130 (2012).
- 614   31.   Faust, T. W., Assous, M., Tepper, J. M. & Koós, T. Neostriatal GABAergic Interneurons

- 615 Mediate Cholinergic Inhibition of Spiny Projection Neurons. *J. Neurosci.* **36**, 9505–11  
616 (2016).
- 617 32. Roseberry, T. K. *et al.* Cell-Type-Specific Control of Brainstem Locomotor Circuits by  
618 Basal Ganglia. *Cell* **164**, 526–537 (2016).
- 619 33. Xiao, C. *et al.* Chronic Nicotine Selectively Enhances  $\alpha 4 \beta 2$  Nicotinic Acetylcholine  
620 Receptors in the Nigrostriatal Dopamine Pathway. *J. Neurosci.* **29**, 12428–12439 (2009).
- 621 34. Ding, J., Peterson, J. D. & Surmeier, D. J. Corticostriatal and Thalamostriatal Synapses  
622 Have Distinctive Properties. *J. Neurosci.* **28**, 6483–6492 (2008).
- 623 35. Ding, J. B., Guzman, J. N., Peterson, J. D., Goldberg, J. A. & Surmeier, D. J. Thalamic  
624 gating of corticostriatal signaling by cholinergic interneurons. *Neuron* **67**, 294–307 (2010).
- 625 36. Faust, T. W., Assous, M., Shah, F., Tepper, J. M. & Koos, T. Novel fast adapting  
626 interneurons mediate cholinergic-induced fast GABA<sub>A</sub> inhibitory postsynaptic currents in  
627 striatal spiny neurons. *Eur J Neurosci* **42**, 1764–1774 (2015).
- 628 37. Stachniak, T. J., Trudel, E. & Bourque, C. W. Cell-Specific Retrograde Signals Mediate  
629 Antiparallel Effects of Angiotensin II on Osmoreceptor Afferents to Vasopressin and  
630 Oxytocin Neurons. *Cell Rep.* **8**, 355–362 (2014).
- 631 38. Gremel, C. M. & Costa, R. M. Orbitofrontal and striatal circuits dynamically encode the  
632 shift between goal-directed and habitual actions. *Nat. Commun.* **4**, 2264 (2013).
- 633 39. Gremel, C. M. *et al.* Endocannabinoid Modulation of Orbitostriatal Circuits Gates Habit  
634 Formation. *Neuron* **90**, 1312–1324 (2016).
- 635 40. Bradfield, L. A., Bertran-Gonzalez, J., Chieng, B. & Balleine, B. W. The thalamostriatal  
636 pathway and cholinergic control of goal-directed action: interlacing new with existing  
637 learning in the striatum. *Neuron* **79**, 153–166 (2013).

- 638 41. Bradfield, L. A. & Balleine, B. W. Thalamic control of dorsomedial striatum regulates  
639 internal state to guide goal-directed action selection. *J. Neurosci.* 3860–16 (2017).  
640 doi:10.1523/JNEUROSCI.3860-16.2017
- 641 42. MacLaren, D. A. A., Wilson, D. I. G. & Winn, P. Selective lesions of the cholinergic  
642 neurons within the posterior pedunculopontine do not alter operant learning or nicotine  
643 sensitization. *Brain Struct. Funct.* **221**, 1481–1497 (2016).
- 644 43. Halbout, B., Liu, A. T. & Ostlund, S. B. A closer look at the effects of repeated cocaine  
645 exposure on adaptive decision-making under conditions that promote goal-directed  
646 control. *Front. Psychiatry* **7**, (2016).
- 647 44. Hilário, M. R. F. Endocannabinoid signaling is critical for habit formation. *Front. Integr.*  
648 *Neurosci.* **1**, (2007).
- 649 45. Dickinson, A. Actions and Habits: The Development of Behavioural Autonomy. *Philos.*  
650 *Trans. R. Soc. B Biol. Sci.* **308**, 67–78 (1985).
- 651 46. Yamamoto, K., Ebihara, K., Koshikawa, N. & Kobayashi, M. Reciprocal regulation of  
652 inhibitory synaptic transmission by nicotinic and muscarinic receptors in rat nucleus  
653 accumbens shell. *J. Physiol.* **591**, 5745–5763 (2013).
- 654 47. Sullivan, M. A., Chen, H. & Morikawa, H. Recurrent inhibitory network among striatal  
655 cholinergic interneurons. *J. Neurosci.* **28**, 8682–90 (2008).
- 656 48. Threlfell, S. *et al.* Striatal dopamine release is triggered by synchronized activity in  
657 cholinergic interneurons. *Neuron* **75**, 58–64 (2012).
- 658 49. Cachope, R. *et al.* Selective activation of cholinergic interneurons enhances accumbal  
659 phasic dopamine release: setting the tone for reward processing. *Cell Rep* **2**, 33–41  
660 (2012).



- 661 50. Guo, Q. *et al.* Whole-Brain Mapping of Inputs to Projection Neurons and Cholinergic  
662 Interneurons in the Dorsal Striatum. *PLoS One* **10**, e0123381 (2015).
- 663 51. Doig, N. M., Magill, P. J., Apicella, P., Bolam, J. P. & Sharott, A. Cortical and thalamic  
664 excitation mediate the multiphasic responses of striatal cholinergic interneurons to  
665 motivationally salient stimuli. *J. Neurosci.* **34**, 3101–17 (2014).
- 666 52. Smith, Y. *et al.* The thalamostriatal system in normal and diseased states. *Front. Syst.*  
667 *Neurosci.* **8**, 5 (2014).
- 668 53. Shink, E., Sidibe, M. & Smith, Y. Efferent connections of the internal globus pallidus in the  
669 squirrel monkey: II. Topography and synaptic organization of pallidal efferents to the  
670 pedunculo-pontine nucleus. *J. Comp. Neurol.* **382**, 348–363 (1997).
- 671 54. Noda, T. & Oka, H. Distribution and morphology of tegmental neurons receiving nigral  
672 inhibitory inputs in the cat: an intracellular HRP study. *J. Comp. Neurol.* **244**, 254–266  
673 (1986).
- 674 55. Martinez-Gonzalez, C., Bolam, J. P. & Mena-Segovia, J. Topographical organization of  
675 the pedunculo-pontine nucleus. *Front Neuroanat* **5**, 22 (2011).
- 676 56. Wilson, C. J., Chang, H. T. & Kitai, S. T. Firing patterns and synaptic potentials of  
677 identified giant aspiny interneurons in the rat neostriatum. *J. Neurosci.* **10**, 508–19  
678 (1990).
- 679 57. Goldberg, J. A. & Reynolds, J. N. Spontaneous firing and evoked pauses in the tonically  
680 active cholinergic interneurons of the striatum. *Neuroscience* **198**, 27–43 (2011).
- 681 58. Takakusaki, K. & Kitai, S. T. Ionic mechanisms involved in the spontaneous firing of  
682 tegmental pedunculo-pontine nucleus neurons of the rat. *Neuroscience* **78**, 771–794  
683 (1997).

- 684 59. Bordas, C., Kovacs, A. & Pal, B. The M-current contributes to high threshold membrane  
685 potential oscillations in a cell type-specific way in the pedunclopontine nucleus of mice.  
686 *Front Cell Neurosci* **9**, 121 (2015).
- 687 60. Apicella, P. The role of the intrinsic cholinergic system of the striatum: What have we  
688 learned from TAN recordings in behaving animals? *Neuroscience* **360**, 81–94 (2017).
- 689 61. Apicella, P., Ravel, S., Deffains, M. & Legallet, E. The Role of Striatal Tonicly Active  
690 Neurons in Reward Prediction Error Signaling during Instrumental Task Performance. *J.*  
691 *Neurosci.* **31**, 1507–1515 (2011).
- 692 62. Okada, K., Toyama, K., Inoue, Y., Isa, T. & Kobayashi, Y. Different pedunclopontine  
693 tegmental neurons signal predicted and actual task rewards. *J Neurosci* **29**, 4858–4870  
694 (2009).
- 695 63. Hilario, M., Holloway, T., Jin, X. & Costa, R. M. Different dorsal striatum circuits mediate  
696 action discrimination and action generalization. *Eur. J. Neurosci.* **35**, 1105–14 (2012).
- 697 64. MacLaren, D. A., Santini, J. A., Russell, A. L., Markovic, T. & Clark, S. D. Deficits in motor  
698 performance after pedunclopontine lesions in rats--impairment depends on demands of  
699 task. *Eur J Neurosci* **40**, 3224–3236 (2014).
- 700 65. Wilson, D. I. G., MacLaren, D. A. A. & Winn, P. Bar pressing for food: differential  
701 consequences of lesions to the anterior versus posterior pedunclopontine. *Eur. J.*  
702 *Neurosci.* **30**, 504–513 (2009).
- 703 66. Syed, A., Baker, P. M. & Ragozzino, M. E. Pedunclopontine tegmental nucleus lesions  
704 impair probabilistic reversal learning by reducing sensitivity to positive reward feedback.  
705 *Neurobiol. Learn. Mem.* **131**, 1–8 (2016).
- 706 67. Leblond, M., Sukharnikova, T., Yu, C., Rossi, M. A. & Yin, H. H. The role of

- 707 pedunculo pontine nucleus in choice behavior under risk. *Eur. J. Neurosci.* **39**, 1664–1670  
708 (2014).
- 709 68. MacLaren, D. A. A., Wilson, D. I. G. & Winn, P. Updating of action-outcome associations  
710 is prevented by inactivation of the posterior pedunculo pontine tegmental nucleus.  
711 *Neurobiol. Learn. Mem.* **102**, 28–33 (2013).
- 712 69. Ragozzino, M. E., Mohler, E. G., Prior, M., Palencia, C. A. & Rozman, S. Acetylcholine  
713 activity in selective striatal regions supports behavioral flexibility. *Neurobiol Learn Mem*  
714 **91**, 13–22 (2009).
- 715 70. Matamalas, M. *et al.* Aging-Related Dysfunction of Striatal Cholinergic Interneurons  
716 Produces Conflict in Action Selection. *Neuron* **90**, 362–373 (2016).
- 717 71. Bolam, J. P., Francis, C. M. & Henderson, Z. Cholinergic input to dopaminergic neurons  
718 in the substantia nigra: a double immunocytochemical study. *Neuroscience* **41**, 483–494  
719 (1991).
- 720 72. Gould, E., Woolf, N. J. & Butcher, L. L. Cholinergic Projections To the Substantia Nigra  
721 From the Pedunculo pontine and Nuclei. **28**, 611–623 (1989).
- 722 73. Oakman, S. A., Faris, P. L., Kerr, P. E., Cozzari, C. & Hartman, B. K. Distribution of  
723 pontomesencephalic cholinergic neurons projecting to substantia nigra differs significantly  
724 from those projecting to ventral tegmental area. *J Neurosci* **15**, 5859–5869 (1995).
- 725 74. Sugimoto, T. *et al.* Cholinergic neurons in the nucleus tegmenti pedunculo pontinus pars  
726 compacta and the caudoputamen of the rat: a light and electron microscopic  
727 immunohistochemical study using a monoclonal antibody to choline acetyltransferase.  
728 *Neurosci Lett* **51**, 113–7. (1984).
- 729 75. Steriade, M., Pare, D., Parent, A. & Smith, Y. Projections of cholinergic and non-

730 cholinergic neurons of the brainstem core to relay and associational thalamic nuclei in the  
731 cat and macaque monkey. *Neuroscience* **25**, 47–67 (1988).

732 76. Pare, D., Smith, Y., Parent, A. & Steriade, M. Projections of brainstem core cholinergic  
733 and non-cholinergic neurons of cat to intralaminar and reticular thalamic nuclei.  
734 *Neuroscience* **25**, 69–86 (1988).

735 77. Lapper, S. R. & Bolam, J. P. Input from the frontal cortex and the parafascicular nucleus  
736 to cholinergic interneurons in the dorsal striatum of the rat. *Neuroscience* **51**, 533–45  
737 (1992).

738 78. Yau, H.-J. *et al.* Pontomesencephalic Tegmental Afferents to VTA Non-dopamine  
739 Neurons Are Necessary for Appetitive Pavlovian Learning. *Cell Rep.* 1–12 (2016).  
740 doi:10.1016/j.celrep.2016.08.007

741 79. Hong, S. & Hikosaka, O. Pedunculo-pontine tegmental nucleus neurons provide reward,  
742 sensorimotor, and alerting signals to midbrain dopamine neurons. *Neuroscience* **282C**,  
743 139–155 (2014).

744 80. Okada, K., Toyama, K., Inoue, Y., Isa, T. & Kobayashi, Y. Different pedunculo-pontine  
745 tegmental neurons signal predicted and actual task rewards. *J. Neurosci.* **29**, 4858–4870  
746 (2009).

747 81. Tian, J. *et al.* Distributed and Mixed Information in Monosynaptic Inputs to Dopamine  
748 Neurons. *Neuron* **91**, 1374–1389 (2016).

749

## 750 **Figure Legends**

751 **Figure 1: Cholinergic inputs to striatal neurons**

752 (A) Transsynaptic labeling of striatonigral SPNs following retrograde Cre transduction in the  
753 substantia nigra pars reticulata (SNR) and pseudorabies transduction in the striatum (STR),  
754 showing both mCherry-positive neurons (red, starter neurons) and YFP-positive neurons (green,  
755 input neurons). Cholinergic input neurons (D) were observed in the pedunclopontine nucleus  
756 (PPN) and the laterodorsal tegmental nucleus (LDT) (E, sum of 3 rats).

757 (B) Transsynaptic labeling of striatopallidal SPNs following retrograde Cre transduction in the  
758 external globus pallidus (GPE) and pseudorabies transduction in the striatum (STR). Cholinergic  
759 inputs neurons (F) were present in the PPN and LDT (G, sum of 3 rats).

760 (C) Transsynaptic labeling of cholinergic interneurons (CINs) in the ChAT::Cre rat following  
761 pseudorabies infection in STR. Cholinergic inputs neurons (H) were present in the PPN and  
762 LDT (I, sum of 3 rats).

763 (J) Quantification of inputs neurons in the PPN and LDT (each circle represents one rat,  
764 obtained from  $n = 3$  rats in striatonigral and striatopallidal labeling, and  $n = 4$  rats in CINs [an  
765 extra animal was added to the analysis]), suggesting that CINs are preferentially targeted by  
766 PPN neurons.

767 (K) Electron microscope image showing an asymmetric synapse in the striatum (black arrow)  
768 formed between a cholinergic YFP+ bouton (b; from the PPN) and a CIN dendrite (d).  
769 Arrowheads show the accumulation of TMB crystals.

770 Scale bar: K, 500nm. Individual data points and mean  $\pm$  SEM are shown. \*  $P < 0.05$ .

771

772 **Figure 2: Cholinergic modulation of striatal spiny projection neurons (SPN)**

773 (A) Transduction of striatal cholinergic interneurons (CINs) in ChAT::cre+ rats with  
774 channelrhodopsin-2 (ChR2) show dense axonal labeling in the striatum and YFP-positive  
775 somata that were immunopositive for ChAT.

776 (B) Transduction of PPN and LDT cholinergic neurons in ChAT::cre+ rats with ChR2 show  
777 patches of dense axonal innervation in the striatum and YFP+/ChAT+ somata in the PPN or  
778 LDT.

779 (C) Individual SPN neurons activity was recorded *in vivo* with a glass pipette during optogenetic  
780 activation (8s, 10 Hz, 50-ms pulses) of PPN cholinergic axons, and were subsequently labeled  
781 with neurobiotin (n = 29 neurons from n = 12 rats). (D) Only neurobiotin labeled SPNs  
782 immunopositive for CTIP2 and surrounded by YFP-positive axons were used for further  
783 analyses. (E) The normalized instantaneous firing rate of all SPNs that responded to laser  
784 stimulation of PPN cholinergic axons shows a slow inhibition during, and after, blue-light  
785 stimulation (color line in the top represents the time points during which the responses were  
786 significantly different from the baseline; cluster-based permutation test,  $P < 0.05$ ).

787 (F-H) Same experimental design to assess modulation of striatal SPNs by LDT cholinergic  
788 axons (n = 19 neurons from n = 15 rats). LDT cholinergic axon stimulation induced a reduction  
789 in the firing rate of SPNs, similar to PPN cholinergic axon stimulation.

790 (I-K) Same experimental design to assess modulation of striatal SPNs by cholinergic axons  
791 arising from local CINs in the dorsal striatum (n = 43 neurons from n = 17 rats). CINs axon  
792 stimulation induced a reduction in the firing rate of SPNs, similar to the responses of the  
793 midbrain.

794 Following cholinergic axon stimulation from each of the three origins, SPNs showed a similar  
795 reduction in the firing rate.

796



797 **Figure 3: Cholinergic modulation of cholinergic interneurons (CINs)**

798 Individual CINs activity was recorded *in vivo* during optogenetic activation (8s, 10 Hz, 50-ms  
799 pulses) of cholinergic axons originating in the PPN (A-C; n = 19 neurons), LDT (D-F; n = 13  
800 neurons) or from local CINs (G-I; n = 10 neurons), and were subsequently labeled with  
801 neurobiotin. Only neurobiotin-labeled CINs that were immunopositive for ChAT and surrounded  
802 by YFP-positive axons were used for further analyses (B, E, H). The normalized instantaneous  
803 firing rate of all CINs that responded to laser stimulation of PPN (C) and LDT (F) show similar  
804 increase in firing rate shortly after stimulation, whereas non-transduced CINs (YFP/ChR2-  
805 negative; I) were strongly inhibited during stimulation (color lines in the top represent the time  
806 points during which the responses were significantly different from the baseline; cluster-based  
807 permutation test,  $P < 0.05$ ). Similar magnitudes of change were elicited by stimulation of PPN  
808 and LDT cholinergic axons.

809

810 **Figure 4: Optogenetic and pharmacological dissection of the cholinergic mechanisms**  
811 **that are regulated by the PPN and LDT**

812 (A) Schematic of the *in vivo* optogenetic experiment design for extracellular recordings of striatal  
813 neurons in ChAT::Cre rats transduced with ChR2 in the midbrain and halorhodopsin (NpHR) in  
814 the striatum.

815 (B) Percentage change in the firing rates of pCINs and pSPNs during stimulation of midbrain  
816 axons transduced with ChR2 (blue, 8s, 10 Hz, 50-ms pulses, 5-7 mW), CINs transduced with  
817 NpHR (yellow, 8s continuous, 3-4 mW), or both simultaneously (green). The firing rate of CINs  
818 was significantly higher during blue light (ChR2 activation) than during yellow (NpHR activation)  
819 or blue/yellow light ( $P < 0.05$ , see text for statistical values). The firing rate of SPNs was

820 significantly lower during blue light compared to yellow and green light ( $P < 0.05$ , see text for  
821 statistical values). Individual data points and mean  $\pm$  SEM are shown.

822 (C) Normalized instantaneous firing rate of all pSPNs following stimulation of midbrain axons  
823 (blue), inhibition of CINs (yellow), or both simultaneously (green) (color lines in the top represent  
824 the time points during which the responses were significantly different from the baseline; cluster-  
825 based permutation test,  $P < 0.05$ ). The inhibition of pSPNs by midbrain axons thus seems to  
826 depend on the activity of CINs.

827 (D) Schematic of the *in vivo* optogenetic and pharmacological experiment design for  
828 extracellular recordings of striatal neurons in ChAT::Cre rats transduced with ChR2 in the  
829 midbrain and a mixture of acetylcholine antagonists (see text for details) applied through an  
830 adjacent glass pipette.

831 (E-F) Individual SPNs that were observed to decrease their firing rate during the ChR2-  
832 mediated activation of PPN cholinergic axons, did not decrease their activity in the presence of  
833 cholinergic blockers ( $n = 7$  neurons from  $n = 7$  rats; E, representative example; F, group data).

834 (G) Schematic of the *in vitro* optogenetic experiment design for whole-cell recordings of CINs in  
835 ChAT::Cre mice transduced with ChR2 in the striatum.

836 (H) Whole cell voltage clamp ( $V_h = -70$  mV) recording of identified, non-transduced CINs  
837 following optogenetic stimulation of ChR2 (5ms, 450nm) showing consistently IPSCs driven by  
838 neighboring CINs axons ( $n = 9$  neurons). IPSCs were strongly reduced by bath application of  
839 bicuculline ( $n = 6$  neurons) or a type II nicotinic receptor blocker (DH $\beta$ E,  $n = 4$  neurons).

840 (I) Representative example of whole cell voltage clamp recording ( $V_h = -70$  mV) of an identified  
841 CIN ( $n = 4$  neurons responding out of 11) receiving a local puff of carbachol (100-250  $\mu$ M, 1 puff  
842 per 3 min).

843

844 **Figure 5: Blocking of LDT cholinergic transmission in the striatum impairs goal-directed**  
845 **action control**

846 (A) Lever pressing during acquisition of goal-directed behavior shows no significant difference  
847 between groups (see text for details).

848 (B-F) Number of presses and normalized lever presses during outcome devaluation testing  
849 across valued (val) or devalued (dev) states in random ratio schedule (RR; goal-directed).

850 Control animals (WT, B) and ChAT::Cre animals were injected in the DLS (C), PPN (D), DMS  
851 (E) or LDT (F). During RR, significant differences in goal-directed devaluation were observed in  
852 all groups except LDT, suggesting that inhibition of LDT axons prevents animals from switching  
853 to goal-directed behavior.

854 Individual data points and mean  $\pm$  SEM are shown. \*  $P < 0.05$ .

855

856 **Figure 6: Blocking of cholinergic transmission in the dorsal striatum impairs habitual**  
857 **action control**

858 A) Lever pressing during acquisition of habitual behavior shows no significant difference  
859 between groups (see text for details).

860 (B-F) Number of presses and normalized lever presses during outcome devaluation testing  
861 across valued (val) or devalued (dev) states in random interval schedule (RI; habitual). Control

862 animals (WT, B) and ChAT::Cre animals were injected in the DLS (C), PPN (D), DMS (E) or  
863 LDT (F). During RI, significant devaluation was observed in DLS and PPN groups (C and D),

864 suggesting that inhibition of PPN and DLS CINs axons prevents animals from switching to  
865 habitual learning.

866 Individual data points and mean  $\pm$  SEM are shown. \*  $P < 0.05$ .
